# Supplementary material for: Comparing four service delivery models for adolescent girls and young women through the ‘Girl Power’ study: protocol for a multisite quasi-experimental cohort study
Source: PubMed Central journal article supplement — BMJ Open. 2017 Dec 14;7(12):e018480. doi: 10.1136/bmjopen-2017-018480 (PMC5735401; doi:10.1136/bmjopen-2017-018480), 2017-12-14
Supplement: bmjopen-2017-018480.draft_revisions.pdf [file bmjopen-2017-018480.draft_revisions.pdf]

# BMJ Open

BMJ Open is committed to open peer review. As part of this commitment we make the peer review history of every article we publish publicly available.

When an article is published we post the peer reviewers' comments and the authors' responses online. We also post the versions of the paper that were used during peer review. These are the versions that the peer review comments apply to.

The versions of the paper that follow are the versions that were submitted during the peer review process. They are not the versions of record or the final published versions. They should not be cited or distributed as the published version of this manuscript.

BMJ Open is an open access journal and the full, final, typeset and author-corrected version of record of the manuscript is available on our site with no access controls, subscription charges or pay-per-view fees (<http://bmjopen.bmj.com>).

If you have any questions on BMJ Open's open peer review process please email [editorial.bmjopen@bmj.com](mailto:editorial.bmjopen@bmj.com)

# BMJ Open

## Comparing Four Service Delivery Models for Adolescent Girls and Young Women through the “Girl Power” study: Protocol for a Multisite Quasi-experimental Cohort Study

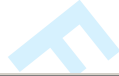

|                                 |                                                                                                                                                                                                                                                                                                                                                                                                                                                                                                                                                                                                                                                                                                                                                                                                                                                                                                                                                       |
|---------------------------------|-------------------------------------------------------------------------------------------------------------------------------------------------------------------------------------------------------------------------------------------------------------------------------------------------------------------------------------------------------------------------------------------------------------------------------------------------------------------------------------------------------------------------------------------------------------------------------------------------------------------------------------------------------------------------------------------------------------------------------------------------------------------------------------------------------------------------------------------------------------------------------------------------------------------------------------------------------|
| Journal:                        | <i>BMJ Open</i>                                                                                                                                                                                                                                                                                                                                                                                                                                                                                                                                                                                                                                                                                                                                                                                                                                                                                                                                       |
| Manuscript ID                   | bmjopen-2017-018480                                                                                                                                                                                                                                                                                                                                                                                                                                                                                                                                                                                                                                                                                                                                                                                                                                                                                                                                   |
| Article Type:                   | Protocol                                                                                                                                                                                                                                                                                                                                                                                                                                                                                                                                                                                                                                                                                                                                                                                                                                                                                                                                              |
| Date Submitted by the Author:   | 11-Jul-2017                                                                                                                                                                                                                                                                                                                                                                                                                                                                                                                                                                                                                                                                                                                                                                                                                                                                                                                                           |
| Complete List of Authors:       | Rosenberg, Nora; University of North Carolina, Pettifor, Audrey; U of North Carolina, Epidemiology<br>Myers, Laura; Desmond Tutu HIV Foundation<br>Phanga, Twambilile; University of North Carolina Project<br>Marcus, Rebecca; Desmond Tutu HIV Foundation<br>Bhushan, Nivedita; University of North Carolina at Chapel Hill, Health Behavior<br>Madlingozi, Nomtha; Desmond Tutu HIV Foundation<br>Vansia, Dhurutika; University of North Carolina Project<br>Masters, Avril; Desmond Tutu HIV Foundation<br>Maseko, Bertha; University of North Carolina Project<br>Mtwisha, Lulu; Desmond Tutu HIV Foundation<br>Kachigamba, Annie; Lilongwe District Health Office<br>Tang, Jennifer; University of North Carolina at Chapel Hill; University of North Carolina Project<br>Hosseinipour, Mina C.; University of North Carolina; University of North Carolina Project<br>Bekker, Linda Gail; University of Cape Town; Desmond Tutu HIV Foundation |
| <b>Primary Subject Heading</b>: | Global health                                                                                                                                                                                                                                                                                                                                                                                                                                                                                                                                                                                                                                                                                                                                                                                                                                                                                                                                         |
| Secondary Subject Heading:      | HIV/AIDS                                                                                                                                                                                                                                                                                                                                                                                                                                                                                                                                                                                                                                                                                                                                                                                                                                                                                                                                              |
| Keywords:                       | HIV & AIDS < INFECTIOUS DISEASES, Child & adolescent psychiatry < PSYCHIATRY, PUBLIC HEALTH, SEXUAL MEDICINE, Reproductive medicine < GYNAECOLOGY                                                                                                                                                                                                                                                                                                                                                                                                                                                                                                                                                                                                                                                                                                                                                                                                     |
|                                 |                                                                                                                                                                                                                                                                                                                                                                                                                                                                                                                                                                                                                                                                                                                                                                                                                                                                                                                                                       |

SCHOLARONE™  
Manuscripts

**Title Page:**

For submission to BMJ Open  
(Study Protocol submission)

**Title:**

Comparing Four Service Delivery Models for Adolescent Girls and Young Women  
through the “Girl Power” study: Protocol for a Multisite Quasi-experimental Cohort Study

**Short Title:**

The “Girl Power” protocol

**Authors:**

Nora E. Rosenberg,<sup>1,2</sup> Audrey E. Pettifor,<sup>2</sup> Laura Myers,<sup>3</sup> Twambilile Phanga,<sup>1</sup> Rebecca Marcus,<sup>3</sup> Nivedita  
Bhushan,<sup>1,2</sup> Nomtha Madlingozi,<sup>3</sup> Dhrutika Vansia,<sup>1</sup> Avril Masters,<sup>3</sup> Bertha Maseko,<sup>1,3</sup> Lulu Mtwisha,<sup>3</sup>  
Annie Kachigamba,<sup>4</sup> Jennifer Tang,<sup>1,2</sup> Mina Hosseinipour,<sup>1,2</sup> Linda-Gail Bekker<sup>3</sup>

**Affiliations:**

1. University of North Carolina Project, Lilongwe, Malawi
2. University of North Carolina, Chapel Hill, Chapel Hill, USA
3. Desmond Tutu HIV Foundation, Cape Town, South Africa
4. Lilongwe District Health Office, Lilongwe, Malawi

**Corresponding author:**

Nora E. Rosenberg, PhD  
University of North Carolina Project  
Tidziwe Centre, Private Bag A-104  
Lilongwe, Malawi  
+265 (0) 99 109 0676  
[Nora\\_Rosenberg@unc.edu](mailto:Nora_Rosenberg@unc.edu)

Abstract word count: approx. 300

Word Count: approx. 2626

## Abstract

**Introduction:** In sub-Saharan Africa, adolescent girls and young women (AGYW) face a range of sexual and reproductive health challenges. Clinical, behavioral, and structural interventions have each reduced these risks and improved health outcomes. However, combinations of these interventions have not been compared to each other or to no intervention at all. The “Girl Power” study is designed to systematically make these comparisons.

**Methods and Analysis:** Four comparable health facilities in Malawi and South Africa (N=8) were selected and assigned to one of the following models of care:

- 1) Standard of care: AGYW can receive family planning, HIV testing and counseling (HTC), and STI syndromic management in non-integrated separate locations with adults. No youth-friendly clinic modifications or trainings are offered.
- 2) Youth-Friendly Health Services (YFHS): AGYW are meant to receive integrated family planning, HTC, and STI services in dedicated youth spaces with youth-friendly modifications and providers trained in YFHS.
- 3) YFHS + behavioral intervention (BI): In addition to YFHS, AGYW can attend twelve monthly theory-driven, facilitator-led, interactive sessions on health, finance, and relationships.
- 4) YFHS + BI + conditional cash transfer (CCT): In addition to YFHS and BI, AGYW receive up to twelve CCTs conditional on monthly BI session attendance.

At each clinic, 250 AGYW 15-24 years old (N=2000 total) will be consented, enrolled, and followed for one year. Each participant will complete a behavioral survey at enrollment, 6-months, and 12-months. All clinical, behavioral, and CCT services will be captured. Outcomes of interest include uptake of each package element and reduction in HIV risk behaviors. A qualitative sub-study will be conducted.

**Ethics and Dissemination:** This study has received ethical approval from the University of North Carolina, the University of Cape Town, and Malawi’s National Health Science Research Committee. Study plans, processes, and findings will be disseminated to local stakeholders, in peer-reviewed journals, and at conferences.

### Strengths and Limitations of the this study

- The Girl Power study is working to address a range of sexual and reproductive health challenges among adolescent girls and young women in two prototypical, yet distinct, sub-Saharan African contexts.
- The Girl Power study is comparing four different models of care to determine which are associated with the greatest uptake of services.
- Each model is being implemented in one clinic in each country; replication would be needed to demonstrate generalizability.
- Implementing multi-level programs for AGYW in SSA has become a major focus of governments and donors over the last several years, but in most cases programmes have not been rigorously evaluated for impact. Girl Power is expected to address this important gap in understanding and provide greater insights into how to support vulnerable AGYW in SSA.

## Introduction

In sub-Saharan Africa (SSA), adolescent girls and young women (AGYW) 15-24 years old are vulnerable to a wide range of sexual and reproductive health challenges, including acquisition of HIV and sexually transmitted infections (STI), unintended and unwanted pregnancies, and intimate partner violence (IPV). These overlapping epidemics have many common underlying health system, behavioral, and structural drivers. Although each set of drivers has been addressed in isolation, there are few examples of multi-level interventions for this highly vulnerable population.

AGYW experience these challenges in a service delivery environment characterized by judgmental provider attitudes, a lack of privacy, inconvenient hours, and non-integrated services. As a result, service utilization by AGYW for sexual and reproductive health remains low. Youth-friendly health services (YFHS) that include provider training and clinic modifications have increased uptake of such services.<sup>1-4</sup> Eight out of nine randomized or quasi-experimental studies in SSA assessing YFHS models with both components increased service uptake by AGYW.<sup>3,5,6</sup> However, to our knowledge, such a platform has never been tested in combination with behavioral and structural interventions.

Offering behavioral interventions (BIs) within a YFHS platform could further enhance service uptake and address other behavioral risks and psychosocial outcomes. The social context of intimate relationships in SSA is marked by severe gender inequality. Gender norms favor male control over sexual intercourse, leaving young women with less power in sexual decision-making.<sup>7-10</sup> Additionally, many young women have older male partners, often with a transactional dimension, who are more likely to be HIV-infected.<sup>11-15</sup> BIs based on the Theory of Gender and Power,<sup>16,17</sup> and Social Cognitive Theory<sup>18</sup> have been shown to address these power imbalances and reduce multiple partnerships, HSV-2 incidence, and IPV.<sup>19-21</sup> All of these evidence-based interventions address gender norms and involve participatory activities for groups of young women. Synthesizing the most effective elements of these “empowerment” interventions and offering them within a YFHS service delivery platform could help reduce behavioral sources of risk, improve psychosocial outcomes, and generate demand for health services. Assessing evidence-based clinical and behavioral interventions is a critical next step.

1  
2  
3 Cash transfers are also a promising tool for preventing HIV among AGYW.<sup>22-24</sup> In Malawi, when  
4 cash payments were given to girls and their guardians, they were more likely to remain in school, less  
5 likely to report age-disparate relationships, and have lower HIV and HSV-2 prevalence.<sup>22</sup> In South Africa,  
6 adolescents living in homes receiving a national child grant reported half the incidence of transactional  
7 sex and much less age-disparate sex than those in homes not receiving it.<sup>23</sup> A cash transfer program has  
8 never been operationalized in a clinical environment and never in combination with a behavioral  
9 intervention. Understanding whether a cash transfer provides benefits in combination with a YFHS  
10 service delivery platform and empowerment-based BI is not known.

11  
12 It is becoming widely acknowledged that combination HIV prevention packages that include  
13 effective, acceptable, and scalable clinical, socio-behavioral and structural interventions may have the  
14 greatest impact.<sup>25-28</sup> However, it is not known how best to combine different intervention levels for  
15 maximal effectiveness for multiple outcomes. The Girl Power study is designed to compare three  
16 different combinations of evidence-based interventions to one another and to a standard of care and to  
17 assess their impact on a range of care-seeking and sexual risk behaviors in two sub-Saharan African  
18 countries.

## 19 20 21 22 23 24 25 26 27 28 29 30 31 32 33 34 35 36 37 **Methods and Analysis**

### 38 *Study Setting*

39  
40 The Girl Power study is an ongoing study (February 2016-November 2017) being conducted in  
41 Malawi and South Africa. These countries represent two prototypical, yet distinct sub-Saharan African  
42 contexts. In Malawi, first births often occur early, at a median age of 19, and within the context of  
43 marriage.<sup>29</sup> In South Africa, sexual activity tends to be outside of the context of marriage, with a  
44 somewhat later age of first birth.<sup>30,31</sup> Malawi is characterized by extreme poverty with the majority of the  
45 population living on less than \$1 per day, whereas South Africa has extreme wealth polarization. In spite  
46 of these socio-economic differences, both countries have high HIV prevalence levels—6% of women 20-  
47 24 are HIV-infected in Malawi and 17% in South Africa, rates considerably higher than their male  
48  
49  
50  
51  
52  
53  
54  
55  
56  
57  
58  
59  
60

1  
2  
3 counterparts.<sup>29</sup> Sexual violence is also a serious problem in both countries, with high rates of non-  
4 consensual sex reported by young women.<sup>32-34</sup> Additionally, both have public sector health facilities  
5 characterized by human resource shortages, stock-outs of pharmaceuticals and supplies, long queues, and  
6 providers who exhibit negative attitudes towards AGYW. It was within this context that the Girl Power  
7 study was conceptualized.  
8  
9

10  
11  
12  
13  
14 Four comparable public sector health facilities were selected in each country. In Malawi, the four  
15 sites are public-sector health centers in Lilongwe. All sites are on a main road, have antenatal volumes  
16 >200 clients per month, and have antenatal HIV prevalence  $\geq 5\%$ . These sites have higher HIV prevalence  
17 than the surrounding rural areas where antenatal HIV prevalence is  $< 5\%$ . In South Africa, the four sites  
18 are in the Klipfontein and Mitchell's Plain areas in the Western Cape. These are high-density, low  
19 socioeconomic peri-urban townships comprised predominantly of informal dwellings. In both countries,  
20 each clinic serves distinct communities.  
21  
22  
23  
24  
25  
26  
27  
28

29  
30 Prior to the study, all sites in both countries offered HIV testing and counseling (HTC),  
31 contraception, and STI services in separate locations with separate queues. Condoms were also available  
32 at all sites—in the pharmacy at the Malawian sites and throughout the clinic at the South African sites. At  
33 all sites in both countries AGYW could receive general health services with the general population.  
34 However, there were no distinct YFHS spaces, times, or providers, no BIs, and no opportunities for  
35 CCTs.  
36  
37  
38  
39  
40  
41  
42  
43

#### 44 *Study Design and Interventions*

45  
46 Girl Power is a quasi-experimental prospective cohort study comparing four different models of  
47 service delivery and their impacts on care-seeking and sexual risk behaviors among AGYW (Figure 1).  
48  
49  
50  
51  
52  
53  
54  
55  
56  
57  
58  
59  
60



In each country, each clinic was randomly assigned to one of the following models of care:

- Model 1: Standard of care (SOC): The SOC offers HTC, contraception, STI syndromic management and condoms to AGYW. However, health care providers have not been trained in YFHS and clinics have not made YFHS modifications, regarding hours, clinic navigation, integration, cost, or space.
- Model 2: YFHS: HTC, contraception, and STI services are offered by health providers who have been trained in YFHS. YFHS modifications have been made to the clinics, including clinic navigation (both countries), a youth-only clinic with service integration (Malawi), free services (Malawi), and longer hours (Malawi).
- Model 3: YFHS + BI: In addition to the YFHS package, participants can attend twelve monthly facilitator-led, small-group interactive sessions. They are based on other evidence-based interventions from the region,<sup>17,19,21</sup> and are motivated by the theory of gender and power and Social Cognitive Theory. These sessions address sexual health topics (e.g. HIV, reproductive health), social issues (e.g. partner communication, peer pressure, and intimate partner violence), financial literacy (e.g. budgeting, saving, and investing), and general topics (e.g. self-esteem, goal-setting, and decision-making). Each session includes an activity to do at home after the session in order to encourage behavior change. Each country adapted curricula in a culturally-responsive manner; although sessions were not identical across countries, they explore similar themes. We expect approximately 12-15 distinct groups at each clinic with approximately 10-20 girls each.
- Model 4: YFHS + BI + conditional cash transfer (CCT): In addition to the YFHS package and empowerment sessions, AGYW received a monthly CCT (approximately \$5.50 in Malawi and \$7.50 in South Africa) conditional on attending the monthly empowerment session. Each young woman could receive up to 12 CCTs. In Malawi, the CCT is being provided in physical cash and in South Africa the CCT is provided electronically.

1  
2  
3 Study and clinical personnel, training activities, and clinical modifications by country and model are  
4 described in greater detail in Table 1.  
5  
6  
7  
8  
9  
10  
11  
12  
13  
14  
15  
16  
17  
18  
19  
20  
21  
22  
23  
24  
25  
26  
27  
28  
29  
30  
31  
32  
33  
34  
35  
36  
37  
38  
39  
40  
41  
42  
43  
44  
45  
46  
47  
48  
49  
50  
51  
52  
53  
54  
55  
56  
57  
58  
59  
60

For peer review only

Table 1. Girl Power Personnel, Training and Clinical Modifications by Clinic and Country

|                                  | Malawi                                                                                                                                                                                                                                                                                                                     |                                                                                                                |                                                                                  |             | South Africa                                                                                                                                                                                                                                                                                                                           |                                                                                  |                                                      |             |
|----------------------------------|----------------------------------------------------------------------------------------------------------------------------------------------------------------------------------------------------------------------------------------------------------------------------------------------------------------------------|----------------------------------------------------------------------------------------------------------------|----------------------------------------------------------------------------------|-------------|----------------------------------------------------------------------------------------------------------------------------------------------------------------------------------------------------------------------------------------------------------------------------------------------------------------------------------------|----------------------------------------------------------------------------------|------------------------------------------------------|-------------|
|                                  | Model 1                                                                                                                                                                                                                                                                                                                    | Model 2                                                                                                        | Model 3                                                                          | Model 4     | Model 1                                                                                                                                                                                                                                                                                                                                | Model 2                                                                          | Model 3                                              | Model 4     |
| Clinical model                   | SOC                                                                                                                                                                                                                                                                                                                        | YFHS                                                                                                           | YFHS+BI                                                                          | YFHS+BI+CCT | SOC                                                                                                                                                                                                                                                                                                                                    | YFHS                                                                             | YFHS+BI                                              | YFHS+BI+CCT |
| <b>Personnel</b>                 |                                                                                                                                                                                                                                                                                                                            |                                                                                                                |                                                                                  |             |                                                                                                                                                                                                                                                                                                                                        |                                                                                  |                                                      |             |
| Research                         | <u>Research officer:</u> These are young (20-29 years) female full-time staff who are responsible for all consenting, screening, enrollment, and behavioral surveys (1/clinic)                                                                                                                                             |                                                                                                                |                                                                                  |             | <u>Research assistant:</u> These are female full-time staff responsible for all consenting, screening, enrolment, and behavioral surveys (1/clinic)                                                                                                                                                                                    |                                                                                  |                                                      |             |
| Outreach and navigation          | <u>Peer educators:</u> These are young (18-24 years) full-time lay staff who are responsible for recruitment and retention activities. At clinics 2, 3, and 4 they also welcome participants, determine their sexual and reproductive health needs, provide patient education, and help with clinic navigation. (2/clinic) |                                                                                                                |                                                                                  |             | <u>Outreach workers:</u> These are temporary staff responsible for community outreach and recruitment at study initiation (2/clinic)<br><u>Peer navigator:</u> These are young full-time staff who welcome participants, discuss sexual and reproductive health needs, fetch patient files, and help with clinic navigation (1/clinic) |                                                                                  |                                                      |             |
| Family planning and STI services | -                                                                                                                                                                                                                                                                                                                          | <u>Nurses:</u> 4-5 government nurses from these sites were assigned to rotate through the Girl Power clinic.   |                                                                                  |             | -                                                                                                                                                                                                                                                                                                                                      | 1-3 government nurses provide SRH services to GP participants                    |                                                      |             |
| HIV counseling and testing       |                                                                                                                                                                                                                                                                                                                            | <u>Counselor:</u> 1 young (<29 years) female HIV counselor was assigned to the Girl Power clinic.              |                                                                                  |             |                                                                                                                                                                                                                                                                                                                                        | 1-3 government HTC counselors are available to attend to Girl Power participants |                                                      |             |
| Workshop facilitation            | -                                                                                                                                                                                                                                                                                                                          | -                                                                                                              | <u>Facilitators:</u> Young (<29) females lead empowerment sessions (1/facility). |             | -                                                                                                                                                                                                                                                                                                                                      | -                                                                                | Facilitators: lead empowerment sessions (1/facility) |             |
| <b>Training</b>                  |                                                                                                                                                                                                                                                                                                                            |                                                                                                                |                                                                                  |             |                                                                                                                                                                                                                                                                                                                                        |                                                                                  |                                                      |             |
| Protocol training                |                                                                                                                                                                                                                                                                                                                            | Study overview and design, clinical data collection, Good Clinical Practice (3 days) (all staff)               |                                                                                  |             | Study overview and design, data collection, sexual and reproductive health refresher, values clarification (1-2 days)                                                                                                                                                                                                                  |                                                                                  |                                                      |             |
| YFHS training                    |                                                                                                                                                                                                                                                                                                                            | Medical and psychosocial support for adolescents (2 day) (all staff)                                           |                                                                                  |             | -                                                                                                                                                                                                                                                                                                                                      | Medical and psychosocial support for adolescents (1 day)                         |                                                      |             |
| Clinical training                |                                                                                                                                                                                                                                                                                                                            | Nurses trained on long-acting reversible contraception (5 days) and STI syndromic management (5 days)          |                                                                                  |             | All nurses expected to be familiar with these provision of all contraceptive methods and STI syndromic management. Provided on-the-job training.                                                                                                                                                                                       |                                                                                  |                                                      |             |
| <b>Clinical Modifications</b>    |                                                                                                                                                                                                                                                                                                                            |                                                                                                                |                                                                                  |             |                                                                                                                                                                                                                                                                                                                                        |                                                                                  |                                                      |             |
| Space                            | -                                                                                                                                                                                                                                                                                                                          | Dedicated space for AGYW service delivery in a separate area from general clinic to ensure privacy from adults |                                                                                  |             | -                                                                                                                                                                                                                                                                                                                                      | Dedicated waiting and/or welcome area for AGYW                                   |                                                      |             |
| Hours                            | Typically morning hours                                                                                                                                                                                                                                                                                                    | AGYW can come in the morning or afternoon                                                                      |                                                                                  |             | AGYW can come in the morning or afternoon                                                                                                                                                                                                                                                                                              |                                                                                  |                                                      |             |
| Cost                             | Some services require payment                                                                                                                                                                                                                                                                                              | All services are free                                                                                          |                                                                                  |             | All services are free                                                                                                                                                                                                                                                                                                                  | All services are free                                                            |                                                      |             |

### *Study Population*

At each of the eight sites, 250 AGYW will be recruited and followed for one year. Eligibility criteria include being female, 15-24 years old, residing in the clinic's catchment area, and willing to be enrolled for a one-year period. The intention is to recruit AGYW who are already sexually active or likely to become sexually active, although this is not a strict eligibility criterion. In total, 1000 AGYW will be enrolled in each country (N=2000 total).

Recruitment will occur through a combination of community outreach activities, self-referral, and referral through invitations from other participants. Outreach workers will visit parts of the catchment area known to be high-risk. Through one-on-one conversations they will build rapport, assess sexual activity and past care-seeking behaviors, promote the services at their site, and invite them to participate. AGYW who enroll in the study will be provided with invitations to invite friends who they believe would also benefit.

Follow-up phone and physical tracing will be conducted for girls who miss their six or twelve month visits.

### *Data Collection and Management*

The two primary sources of data collection are a detailed behavioral survey and service uptake data. The behavioral survey is administered at three time points—at study enrollment, month six, and month 12. The behavioral survey contains questions about demographics, socio-economic status, past and current care-seeking behaviors, sexual history, depression, intimate partner violence, and alcohol consumption. The twelve-month assessment also includes assessments of the BI and the CCT. The behavioral survey will be self-administered in South Africa, except among illiterate participants. It will be interviewer-administered by young female research assistants in Malawi. Surveys will be administered on encrypted password-protected Android tablets using Open Data Kit software and stored on secure servers.

In both countries, we will document delivery of HTC, family planning, and STI services. Due to the unique clinical contexts, data collection will occur differently in the two countries. In Malawi, a clinic

1  
2  
3 card that contains all clinical information has been developed and will be used by clinical staff. In South  
4  
5 Africa, research assistants will transcribe clinical activities in existing clinical records onto a study-  
6  
7 specific form. In both countries, these data will then be entered into secure databases by trained research  
8  
9 assistants.  
10

11 In both countries, each participant will be identified through a unique identifier. In South Africa,  
12  
13 participants' identities will be verified through biometric data.  
14  
15

### 16 17 18 *Study outcomes, analytic methods, and sample size* 19

20 The first set of primary outcomes are care-seeking behaviors. We will compare the proportion of  
21  
22 participants who receive HTC, male and female condoms, contraception, and STI services. We will also  
23  
24 look at the proportion of participants who engage in dual protection. For all of these services, we will  
25  
26 assess the proportion of participants who use each method ever, continuously, and for the first time during  
27  
28 their year in Girl Power. The primary outcome of interest is uptake of dual protection defined as  
29  
30 simultaneous uptake of male or female condoms and another modern method of contraception. These data  
31  
32 are available both through the behavioral survey and clinical abstraction.  
33  
34

35 HIV risk behaviors collected on the behavioral survey are also key outcomes of interest.  
36  
37 Questions of particular interest are the proportion of AGYW who have multiple sexual partners, have a  
38  
39 considerably older male partner, engage in transactional sex, and experience IPV. We will assess how  
40  
41 these indicators change between enrollment and each follow-up time point and compare these changes  
42  
43 between clinics.  
44  
45

46 For all of these key outcomes of interest, we will conduct an intention to treat analysis, analyzing  
47  
48 each participant in her assigned clinic. We will use generalized estimating equations to account for  
49  
50 correlated records between each participant. A log or identity link, binomial distribution, and robust  
51  
52 variance estimates will be used to estimate risk ratios and risk differences and ninety-five percent  
53  
54 confidence intervals. We will compare absolute differences at each time point, as well as changes over  
55  
56 time.  
57  
58  
59  
60

1  
2  
3 For the primary outcome of interest (uptake of dual protection) using two-sided tests; an alpha  
4 level of 0.05; and uptake levels of 10% (model 1), 20% (model 2), 35% (model 3) and 50% (model 4), we  
5 will have  $\geq 85\%$  power to detect differences between any two arms in each country.  
6  
7  
8  
9

### 10 11 *Qualitative Sub-study*

12  
13  
14 A qualitative sub-study will be conducted to better understand participant experiences with each  
15 service delivery model. Twelve to 15 in-depth interviews (IDIs) will be conducted at each site in each  
16 country (N=96-120 IDIs total). IDIs will focus on individual experiences with SOC, YFHS, BI, and CCT.  
17  
18 At each clinic we will purposively select a mixture of good care-seekers, poor-care-seekers, and HIV-  
19 infected young women. Focus group discussions (FGDs) (N=2-3/site) will address norms surrounding  
20 these same topics and strategies for improving or enhancing these services. At each site, we will have at  
21 least one FGD with adolescent girls 15-19 years old and one with young women 20-24 years old. IDIs  
22 and FGDs will be conducted in Chichewa in Malawi and in isiXhosa or English in South Africa. All IDIs  
23 and FGDs will be transcribed and translated into English. They will be coded and analyzed using a  
24 thematic approach.  
25  
26  
27  
28  
29  
30  
31  
32  
33  
34  
35  
36  
37

### 38 *Limitations*

39  
40 The Girl Power study has several limitations. First, we are not powered to observe differences in  
41 biologic outcomes, such as HIV, STI, or pregnancy incidence. Rather, we are only observing behavioral  
42 intermediates. Second, due to budget constraints, we are not conducting a cluster randomized control trial  
43 which would be the ideal design to assess our research question. As such, it may be difficult to determine  
44 whether observed outcomes are due to our interventions or natural differences between clinics. Finally,  
45 due to the important contextual differences between countries, our interventions are similar but not  
46 identical. This may make it difficult to determine if different findings across countries are due to the  
47 context or the variations in the interventions themselves.  
48  
49  
50  
51  
52  
53  
54  
55  
56  
57  
58  
59  
60

## Ethics and Dissemination

This study was approved by the University of North Carolina Institutional Review Board (IRBIS 15-2901) and two local regulatory bodies: the Malawi National Health Sciences Research Committee (15/7/1447) and the University of Cape Town Human Research Ethics Committee (815/2015). In South Africa, all AGYW 15-24 years can decide whether to provide informed consent for themselves or seek optional parental consent. In Malawi, AGYW 18-24 years will provide informed consent for themselves. AGYW 15-17 years will provide assent and have a parent, guardian, or authorized representative provide informed consent. At each site, a community club will identify individuals  $\geq 18$  years who could serve as authorized representatives.

Dissemination activities will occur at all stages of the study: prior to implementation, at intermediate points during implementation, and at study culmination. Prior to study implementation, meetings were held with key local stakeholders, such as local health leadership (e.g. district, province, or city managers), clinical supervisors, and clinical staff. These meetings were designed to seek permission for study implementation, orient these stakeholders to study goals, and work together on implementation questions. Sensitization activities were also conducted with key community stakeholders, such as local chiefs and religious leaders, school headmasters, and library managers. These sensitizations were designed to inform key local leaders about the study, elicit buy-in and support, and facilitate recruitment. During study implementation, these same stakeholders will be engaged to report on study progress and discuss challenges. At the end of the study, results will be disseminated so that stakeholders are aware of the study's primary findings. Additionally, results will be disseminated in peer-reviewed journals and at national and international meetings and conferences. Dissemination of final results is expected in 2018.

## Conclusion

Implementing combination interventions for AGYW in SSA has become a major focus of governments and donors over the last several years. In most cases however, programs have not been

1  
2  
3 rigorously evaluated for impact. Girl Power is expected to address this important gap in understanding  
4  
5 and provide greater insights into how to support vulnerable AGYW in SSA.  
6  
7  
8

### 9 10 **Author Contributions**

11 NER, AEP, and LGB designed the study. Other co-authors are responsible for study coordination,  
12  
13 implementation, and analysis. All authors either wrote or made substantial edits to the draft, approved the  
14  
15 final version and take responsibility for the work.  
16  
17  
18

### 19 20 **Funding Statement**

21 The Girl Power study is funded by Evidence for HIV Prevention in Southern Africa (EHPSA), a DFID  
22  
23 program managed by Mott MacDonald. N.E.R. is supported by funding from the National Institutes of  
24  
25 Health (R00 MH104154).  
26  
27  
28

### 29 30 **Competing Interests Statement**

31 We have no competing interests to declare.  
32  
33  
34  
35  
36  
37

### 38 39 **References**

- 40 1. Mavedzenge SN, Luecke E, Ross DA. Effective approaches for programming to reduce  
41  
42 adolescent vulnerability to HIV infection, HIV risk, and HIV-related morbidity and mortality: a  
43  
44 systematic review of systematic reviews. *Journal of acquired immune deficiency syndromes*. Jul 1  
45  
46 2014;66 Suppl 2:S154-169.  
47
- 48 2. Napierala Mavedzenge SM, Doyle AM, Ross DA. HIV prevention in young people in sub-  
49  
50 Saharan Africa: a systematic review. *The Journal of adolescent health : official publication of the*  
51  
52 *Society for Adolescent Medicine*. Dec 2011;49(6):568-586.  
53  
54
- 55 3. Denno DM, Hoopes AJ, Chandra-Mouli V. Effective strategies to provide adolescent sexual and  
56  
57 reproductive health services and to increase demand and community support. *The Journal of*  
58  
59  
60



- 1  
2  
3 *adolescent health* : official publication of the Society for Adolescent Medicine. Jan 2015;56(1  
4  
5 Suppl):S22-41.  
6  
7  
8 4. Chandra-Mouli V, McCarraher DR, Phillips SJ, Williamson NE, Hainsworth G. Contraception  
9  
10 for adolescents in low and middle income countries: needs, barriers, and access. *Reproductive*  
11  
12 *health*. 2014;11(1):1.  
13  
14 5. Mbonye AK. Disease and health seeking patterns among adolescents in Uganda. *International*  
15  
16 *journal of adolescent medicine and health*. Apr-Jun 2003;15(2):105-112.  
17  
18 6. Ross DA, Chagalucha J, Obasi AI, et al. Biological and behavioural impact of an adolescent  
19  
20 sexual health intervention in Tanzania: a community-randomized trial. *Aids*. Sep 12  
21  
22 2007;21(14):1943-1955.  
23  
24 7. MacPhail C, Campbell C. 'I think condoms are good but, aai, I hate those things': condom use  
25  
26 among adolescents and young people in a Southern African township. *Social Science &*  
27  
28 *Medicine*. 2001;52:1613-1627.  
29  
30 8. Harrison A, Xaba N, Kunene P. Understanding safe sex: gender narratives of HIV and pregnancy  
31  
32 prevention by rural South African school going youth. *Reproductive health matters*.  
33  
34 2001;9(17):63-71.  
35  
36 9. Pettifor A, Macphail C, Anderson AD, Maman S. 'If I buy the Kellogg's then he should [buy] the  
37  
38 milk': young women's perspectives on relationship dynamics, gender power and HIV risk in  
39  
40 Johannesburg, South Africa. *Cult Health Sex*. 2012;14(5):477-490.  
41  
42  
43 10. Jaspan HB, Flisher AJ, Myer L, et al. Sexual health, HIV risk, and retention in an adolescent  
44  
45 HIV-prevention trial preparatory cohort. *The Journal of adolescent health* : official publication of  
46  
47 *the Society for Adolescent Medicine*. Jul 2011;49(1):42-46.  
48  
49  
50 11. Dunkle KL, Jewkes RK, Brown HC, Gray GE, McIntyre JA, Harlow SD. Gender-based  
51  
52 violence, relationship power, and risk of HIV infection in women attending antenatal clinics in  
53  
54 South Africa. *Lancet*. May 1 2004;363(9419):1415-1421.  
55  
56  
57  
58  
59  
60

- 1  
2  
3  
4  
5  
6  
7  
8  
9  
10  
11  
12  
13  
14  
15  
16  
17  
18  
19  
20  
21  
22  
23  
24  
25  
26  
27  
28  
29  
30  
31  
32  
33  
34  
35  
36  
37  
38  
39  
40  
41  
42  
43  
44  
45  
46  
47  
48  
49  
50  
51  
52  
53  
54  
55  
56  
57  
58  
59  
60
12. Pettifor A, Measham D, Rees H, Padian N. Sexual power and HIV risk, South Africa. *Emerging infectious diseases*. 2004;10(11):1996-2004.
  13. Gilbert L, Raj A, Hien D, Stockman J, Terlikbayeva A, Wyatt G. Targeting the SAVA (Substance Abuse, Violence, and AIDS) Syndemic Among Women and Girls: A Global Review of Epidemiology and Integrated Interventions. *Journal of acquired immune deficiency syndromes*. Jun 1 2015;69 Suppl 2:S118-127.
  14. Wamoyi J, Stobeanau K, Bobrova N, Abramsky T, Watts C. Transactional sex and risk for HIV infection in sub-Saharan Africa: a systematic review and meta-analysis. *Journal of the International AIDS Society*. 2016;19(1):20992.
  15. Dunkle KL, Jewkes RK, Brown HC, Gray GE, McIntyre JA, Harlow SD. Transactional sex among women in Soweto, South Africa: prevalence, risk factors and association with HIV infection. *Social science & medicine*. Oct 2004;59(8):1581-1592.
  16. Wingood GM, Scd, DiClemente RJ. Application of the theory of gender and power to examine HIV-related exposures, risk factors, and effective interventions for women. *Health education & behavior : the official publication of the Society for Public Health Education*. Oct 2000;27(5):539-565.
  17. Wingood GM, Reddy P, Lang DL, et al. Efficacy of SISTA South Africa on sexual behavior and relationship control among isiXhosa women in South Africa: results of a randomized-controlled trial. *Journal of acquired immune deficiency syndromes*. Jun 1 2013;63 Suppl 1:S59-65.
  18. Bandura A. Social cognitive theory: an agentic perspective. *Annual review of psychology*. 2001;52:1-26.
  19. Jewkes R, Nduna M, Levin J, et al. Impact of stepping stones on incidence of HIV and HSV-2 and sexual behaviour in rural South Africa: cluster randomised controlled trial. *Bmj*. 2008;337:a506.

- 1  
2  
3  
4  
5  
6  
7  
8  
9  
10  
11  
12  
13  
14  
15  
16  
17  
18  
19  
20  
21  
22  
23  
24  
25  
26  
27  
28  
29  
30  
31  
32  
33  
34  
35  
36  
37  
38  
39  
40  
41  
42  
43  
44  
45  
46  
47  
48  
49  
50  
51  
52  
53  
54  
55  
56  
57  
58  
59  
60
20. Jewkes RK, Dunkle K, Nduna M, Shai N. Intimate partner violence, relationship power inequity, and incidence of HIV infection in young women in South Africa: a cohort study. *Lancet*. Jul 3 2010;376(9734):41-48.
  21. Abramsky T, Devries K, Kiss L, et al. A community mobilisation intervention to prevent violence against women and reduce HIV/AIDS risk in Kampala, Uganda (the SASA! Study): study protocol for a cluster randomised controlled trial. *Trials*. 2012;13:96.
  22. Baird SJ, Garfein RS, McIntosh CT, Ozler B. Effect of a cash transfer programme for schooling on prevalence of HIV and herpes simplex type 2 in Malawi: a cluster randomised trial. *Lancet*. Apr 7 2012;379(9823):1320-1329.
  23. Cluver L, Orkin M, Boyes M, Sherr L. The child support grant and adolescent risk of HIV infection in South Africa--authors' reply. *The Lancet. Global health*. Apr 2014;2(4):e200.
  24. Pettifor A, MacPhail C, Nguyen N, Rosenberg M. Can money prevent the spread of HIV? A review of cash payments for HIV prevention. *AIDS and behavior*. Oct 2012;16(7):1729-1738.
  25. Cluver LD, Orkin FM, Boyes ME, Sherr L. Cash plus care: social protection cumulatively mitigates HIV-risk behaviour among adolescents in South Africa. *Aids*. Jul 2014;28 Suppl 3:S389-397.
  26. Vermund SH, Hayes RJ. Combination prevention: new hope for stopping the epidemic. *Current HIV/AIDS reports*. Jun 2013;10(2):169-186.
  27. Cluver LD, Orkin FM, Yakubovich AR, Sherr L. Combination Social Protection for Reducing HIV-Risk Behavior Among Adolescents in South Africa. *Journal of acquired immune deficiency syndromes*. May 1 2016;72(1):96-104.
  28. Merson M, Padian N, Coates TJ, et al. Combination HIV prevention. *Lancet*. Nov 22 2008;372(9652):1805-1806.
  29. National\_Statistics\_Office\_Malawi, ICF. *Malawi Demographic and Health Survey 2015-2016*. Zomba, Malawi and Rockville, Maryland, USA2017.

- 1  
2  
3  
4  
5  
6  
7  
8  
9  
10  
11  
12  
13  
14  
15  
16  
17  
18  
19  
20  
21  
22  
23  
24  
25  
26  
27  
28  
29  
30  
31  
32  
33  
34  
35  
36  
37  
38  
39  
40  
41  
42  
43  
44  
45  
46  
47  
48  
49  
50  
51  
52  
53  
54  
55  
56  
57  
58  
59  
60
30. MacPhail C, Pettifor AE, Pascoe S, Rees HV. Contraception use and pregnancy among 15-24 year old South African women: a nationally representative cross-sectional survey. *BMC medicine*. 2007;5:31.
31. Statistics South Africa. Census 2011: Fertility in South Africa. Pretoria, South Africa 2015.
32. Dunkle KL, Jewkes HC, Brown, et al. Prevalence and patterns of gender-based violence and revictimization among women attending antenatal clinics in Soweto, South Africa. *American Journal of Epidemiology*. 2004;160:230-239.
33. Jewkes R, Sikweyiya Y, Morrell R, et al. Understanding men's health and use of violence: interface of rape and HIV in South Africa. Medical Research Council, Pretoria, South Africa, 2009.
34. Violence against children and young women in Malawi: Findings from a national survey, 2013. UNICEF, 2014.

1  
2  
3  
4  
5  
6  
7  
8  
9  
10  
11  
12  
13  
14  
15  
16  
17  
18  
19  
20  
21  
22  
23  
24  
25  
26  
27  
28  
29  
30  
31  
32  
33  
34  
35  
36  
37  
38  
39  
40  
41  
42  
43  
44  
45  
46  
47  
48  
49  
50  
51  
52  
53  
54  
55  
56  
57  
58  
59  
60

Figure 1: Depiction of Girl Power Study Design

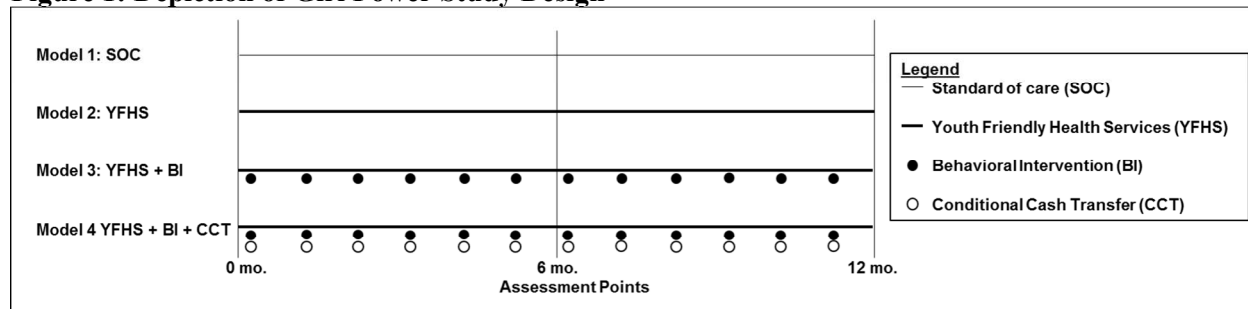

For peer review only

STROBE 2007 (v4) Statement—Checklist of items that should be included in reports of *cohort studies*

| Section/Topic                | Item # | Recommendation                                                                                                                                                                       | Reported on page # |
|------------------------------|--------|--------------------------------------------------------------------------------------------------------------------------------------------------------------------------------------|--------------------|
| Title and abstract           | 1      | (a) Indicate the study's design with a commonly used term in the title or the abstract                                                                                               | 1,2                |
|                              |        | (b) Provide in the abstract an informative and balanced summary of what was done and what was found                                                                                  | 2                  |
| <b>Introduction</b>          |        |                                                                                                                                                                                      |                    |
| Background/rationale         | 2      | Explain the scientific background and rationale for the investigation being reported                                                                                                 | 4-5                |
| Objectives                   | 3      | State specific objectives, including any pre-specified hypotheses                                                                                                                    | 5                  |
| <b>Methods</b>               |        |                                                                                                                                                                                      |                    |
| Study design                 | 4      | Present key elements of study design early in the paper                                                                                                                              | 6-8                |
| Setting                      | 5      | Describe the setting, locations, and relevant dates, including periods of recruitment, exposure, follow-up, and data collection                                                      | 5-6                |
| Participants                 | 6      | (a) Give the eligibility criteria, and the sources and methods of selection of participants. Describe methods of follow-up                                                           | 10                 |
|                              |        | (b) For matched studies, give matching criteria and number of exposed and unexposed                                                                                                  | NA                 |
| Variables                    | 7      | Clearly define all outcomes, exposures, predictors, potential confounders, and effect modifiers. Give diagnostic criteria, if applicable                                             | 10-12              |
| Data sources/<br>measurement | 8*     | For each variable of interest, give sources of data and details of methods of assessment (measurement). Describe comparability of assessment methods if there is more than one group | 10-12              |
| Bias                         | 9      | Describe any efforts to address potential sources of bias                                                                                                                            | 12                 |
| Study size                   | 10     | Explain how the study size was arrived at                                                                                                                                            | 12                 |
| Quantitative variables       | 11     | Explain how quantitative variables were handled in the analyses. If applicable, describe which groupings were chosen and why                                                         | 11                 |
| Statistical methods          | 12     | (a) Describe all statistical methods, including those used to control for confounding                                                                                                | 11                 |
|                              |        | (b) Describe any methods used to examine subgroups and interactions                                                                                                                  | NA                 |
|                              |        | (c) Explain how missing data were addressed                                                                                                                                          | NA                 |
|                              |        | (d) If applicable, explain how loss to follow-up was addressed                                                                                                                       | NA                 |
|                              |        | (e) Describe any sensitivity analyses                                                                                                                                                | NA                 |
| <b>Results</b>               |        |                                                                                                                                                                                      |                    |

|                          |     |                                                                                                                                                                                                                                                                                                                                                                                                               |    |    |
|--------------------------|-----|---------------------------------------------------------------------------------------------------------------------------------------------------------------------------------------------------------------------------------------------------------------------------------------------------------------------------------------------------------------------------------------------------------------|----|----|
| Participants             | 13* | (a) Report numbers of individuals at each stage of study—eg numbers potentially eligible, examined for eligibility, confirmed eligible, included in the study, completing follow-up, and analysed<br>(b) Give reasons for non-participation at each stage<br>(c) Consider use of a flow diagram                                                                                                               | NA |    |
| Descriptive data         | 14* | (a) Give characteristics of study participants (eg demographic, clinical, social) and information on exposures and potential confounders<br>(b) Indicate number of participants with missing data for each variable of interest<br>(c) Summarise follow-up time (eg, average and total amount)                                                                                                                |    |    |
| Outcome data             | 15* | Report numbers of outcome events or summary measures over time                                                                                                                                                                                                                                                                                                                                                |    |    |
| Main results             | 16  | (a) Give unadjusted estimates and, if applicable, confounder-adjusted estimates and their precision (eg, 95% confidence interval). Make clear which confounders were adjusted for and why they were included<br>(b) Report category boundaries when continuous variables were categorized<br>(c) If relevant, consider translating estimates of relative risk into absolute risk for a meaningful time period |    |    |
| Other analyses           | 17  | Report other analyses done—eg analyses of subgroups and interactions, and sensitivity analyses                                                                                                                                                                                                                                                                                                                |    |    |
| <b>Discussion</b>        |     |                                                                                                                                                                                                                                                                                                                                                                                                               |    |    |
| Key results              | 18  | Summarise key results with reference to study objectives                                                                                                                                                                                                                                                                                                                                                      |    | NA |
| <b>Limitations</b>       |     |                                                                                                                                                                                                                                                                                                                                                                                                               |    |    |
| Interpretation           | 20  | Give a cautious overall interpretation of results considering objectives, limitations, multiplicity of analyses, results from similar studies, and other relevant evidence                                                                                                                                                                                                                                    |    |    |
| Generalisability         | 21  | Discuss the generalisability (external validity) of the study results                                                                                                                                                                                                                                                                                                                                         |    |    |
| <b>Other information</b> |     |                                                                                                                                                                                                                                                                                                                                                                                                               |    |    |
| Funding                  | 22  | Give the source of funding and the role of the funders for the present study and, if applicable, for the original study on which the present article is based                                                                                                                                                                                                                                                 | 14 |    |

\*Give information separately for cases and controls in case-control studies and, if applicable, for exposed and unexposed groups in cohort and cross-sectional studies.

**Note:** An Explanation and Elaboration article discusses each checklist item and gives methodological background and published examples of transparent reporting. The STROBE checklist is best used in conjunction with this article (freely available on the Web sites of PLoS Medicine at <http://www.plosmedicine.org/>, Annals of Internal Medicine at <http://www.annals.org/>, and Epidemiology at <http://www.epidem.com/>). Information on the STROBE Initiative is available at [www.strobe-statement.org](http://www.strobe-statement.org).

# BMJ Open

## Comparing Four Service Delivery Models for Adolescent Girls and Young Women through the "Girl Power" study: Protocol for a Multisite Quasi-experimental Cohort Study

|                                 |                                                                                                                                                                                                                                                                                                                                                                                                                                                                                                                                                                                                                                                                                                                                                                                                                                                                                                                                                      |
|---------------------------------|------------------------------------------------------------------------------------------------------------------------------------------------------------------------------------------------------------------------------------------------------------------------------------------------------------------------------------------------------------------------------------------------------------------------------------------------------------------------------------------------------------------------------------------------------------------------------------------------------------------------------------------------------------------------------------------------------------------------------------------------------------------------------------------------------------------------------------------------------------------------------------------------------------------------------------------------------|
| Journal:                        | <i>BMJ Open</i>                                                                                                                                                                                                                                                                                                                                                                                                                                                                                                                                                                                                                                                                                                                                                                                                                                                                                                                                      |
| Manuscript ID                   | bmjopen-2017-018480.R1                                                                                                                                                                                                                                                                                                                                                                                                                                                                                                                                                                                                                                                                                                                                                                                                                                                                                                                               |
| Article Type:                   | Protocol                                                                                                                                                                                                                                                                                                                                                                                                                                                                                                                                                                                                                                                                                                                                                                                                                                                                                                                                             |
| Date Submitted by the Author:   | 22-Sep-2017                                                                                                                                                                                                                                                                                                                                                                                                                                                                                                                                                                                                                                                                                                                                                                                                                                                                                                                                          |
| Complete List of Authors:       | Rosenberg, Nora; University of North Carolina, Pettifor, Audrey; U of North Carolina, Epidemiology<br>Myers, Laura; Desmond Tutu HIV Foundation<br>Phanga, Twambilile; University of North Carolina Project<br>Marcus, Rebecca; Desmond Tutu HIV Foundation<br>Bhushan, Nivedita; University of North Carolina at Chapel Hill, Health Behavior<br>Madlingozi, Nomtha; Desmond Tutu HIV Foundation<br>Vansia, Dhrukika; University of North Carolina Project<br>Masters, Avril; Desmond Tutu HIV Foundation<br>Maseko, Bertha; University of North Carolina Project<br>Mtwisha, Lulu; Desmond Tutu HIV Foundation<br>Kachigamba, Annie; Lilongwe District Health Office<br>Tang, Jennifer; University of North Carolina at Chapel Hill; University of North Carolina Project<br>Hosseinipour, Mina C.; University of North Carolina; University of North Carolina Project<br>Bekker, Linda Gail; University of Cape Town; Desmond Tutu HIV Foundation |
| <b>Primary Subject Heading</b>: | Global health                                                                                                                                                                                                                                                                                                                                                                                                                                                                                                                                                                                                                                                                                                                                                                                                                                                                                                                                        |
| Secondary Subject Heading:      | HIV/AIDS                                                                                                                                                                                                                                                                                                                                                                                                                                                                                                                                                                                                                                                                                                                                                                                                                                                                                                                                             |
| Keywords:                       | EPIDEMIOLOGY, International health services < HEALTH SERVICES ADMINISTRATION & MANAGEMENT, HIV & AIDS < INFECTIOUS DISEASES, Public health < INFECTIOUS DISEASES, Child protection < PAEDIATRICS                                                                                                                                                                                                                                                                                                                                                                                                                                                                                                                                                                                                                                                                                                                                                     |
|                                 |                                                                                                                                                                                                                                                                                                                                                                                                                                                                                                                                                                                                                                                                                                                                                                                                                                                                                                                                                      |

SCHOLARONE™  
Manuscripts



**Title Page:**

For submission to BMJ Open  
(Study Protocol submission)

**Title:**

Comparing Four Service Delivery Models for Adolescent Girls and Young Women  
through the “Girl Power” study: Protocol for a Multisite Quasi-experimental Cohort Study

**Short Title:**

The “Girl Power” protocol

**Authors:**

Nora E. Rosenberg,<sup>1,2</sup> Audrey E. Pettifor,<sup>2</sup> Laura Myers,<sup>3</sup> Twambilile Phanga,<sup>1</sup> Rebecca Marcus,<sup>3</sup> Nivedita  
Bhushan,<sup>1,2</sup> Nomtha Madlingozi,<sup>3</sup> Dhrutika Vansia,<sup>1</sup> Avril Masters<sup>3</sup>, Bertha Maseko,<sup>1,3</sup> Lulu Mtwisha,<sup>3</sup>  
Annie Kachigamba,<sup>4</sup> Jennifer Tang,<sup>1,2</sup> Mina Hosseinipour,<sup>1,2</sup> Linda-Gail Bekker<sup>3</sup>

**Affiliations:**

1. University of North Carolina Project, Lilongwe, Malawi
2. University of North Carolina, Chapel Hill, Chapel Hill, USA
3. Desmond Tutu HIV Foundation, Cape Town, South Africa
4. Lilongwe District Health Office, Lilongwe, Malawi

**Corresponding author:**

Nora E. Rosenberg, PhD  
University of North Carolina Project  
Tidziwe Centre, Private Bag A-104  
Lilongwe, Malawi  
+265 (0) 99 109 0676  
[Nora\\_Rosenberg@unc.edu](mailto:Nora_Rosenberg@unc.edu)

Abstract word count: 300

Word Count: 2728

## Abstract

**Introduction:** In sub-Saharan Africa, adolescent girls and young women (AGYW) face a range of sexual and reproductive health challenges. Clinical, behavioral, and structural interventions have each reduced these risks and improved health outcomes. However, combinations of these interventions have not been compared to each other or to no intervention at all. The “Girl Power” study is designed to systematically make these comparisons.

**Methods and Analysis:** Four comparable health facilities in Malawi and South Africa (N=8) were selected and assigned to one of the following models of care:

- 1) Standard of care: AGYW can receive family planning, HIV testing and counseling (HTC), and STI syndromic management in 3 separate locations with 3 separate queues with the general population. No youth-friendly spaces, clinic modifications or trainings are offered.
- 2) Youth-Friendly Health Services (YFHS): AGYW are meant to receive integrated family planning, HTC, and STI services in dedicated youth spaces with youth-friendly modifications and providers trained in YFHS.
- 3) YFHS + behavioral intervention (BI): In addition to YFHS, AGYW can attend twelve monthly theory-driven, facilitator-led, interactive sessions on health, finance, and relationships.
- 4) YFHS + BI + conditional cash transfer (CCT): In addition to YFHS and BI, AGYW receive up to twelve CCTs conditional on monthly BI session attendance.

At each clinic, 250 AGYW 15-24 years old (N=2000 total) will be consented, enrolled, and followed for one year. Each participant will complete a behavioral survey at enrollment, 6-months, and 12-months. All clinical, behavioral, and CCT services will be captured. Outcomes of interest include uptake of each package element and reduction in HIV risk behaviors. A qualitative sub-study will be conducted.

**Ethics/Dissemination:** This study has received ethical approval from the University of North Carolina, the University of Cape Town, and Malawi’s National Health Science Research Committee. Study plans, processes, and findings will be disseminated to stakeholders, in peer-reviewed journals, and at conferences.

### Strengths and Limitations of the this study

- Within each country, the selection of four comparable clinics and random assignment of each to one of the four models of service delivery is a key strength. However, each model is being implemented in only one clinic in each country. A cluster randomized controlled trial, with multiple clinics in each model in each country would be a next step.
- In spite of implementing four different models of care, efforts are being made to ensure comparable recruitment, retention, and data ascertainment procedures across sites, and to minimize contamination.
- The ability to triangulate these behavioral outcomes from both clinical and self-reported data is a strength. However, the study is not powered to detect differences in biologic outcomes, especially HIV incidence.
- Implementing a similar set of models in two distinct sub-Saharan contexts enhances generalizability. However, findings may not generalize to every sub-Saharan context.

## Introduction

In sub-Saharan Africa (SSA), adolescent girls and young women (AGYW) 15-24 years old are vulnerable to a wide range of sexual and reproductive health (SRH) challenges, including acquisition of HIV and sexually transmitted infections (STI), unintended and unwanted pregnancies, and intimate partner violence (IPV). These challenges have many common underlying health system, behavioral, and structural drivers that have not, to our knowledge, been addressed and assessed in combination—in a youth friendly service delivery environment, with behavioral interventions, and with socio-economic support.

AGYW in SSA typically experience a service delivery environment characterized by judgmental provider attitudes, a lack of privacy, inconvenient hours, and non-integrated services.<sup>1</sup> As a result, service utilization by AGYW for SRH remains low. Youth-friendly health services (YFHS) that include provider training, clinic modifications, and community-based demand creation are promising approaches for increasing uptake of such services.<sup>1-6</sup> Eight out of nine randomized or quasi-experimental studies in SSA assessing YFHS models with these components increased service uptake by AGYW.<sup>3</sup> However, to our knowledge, such a platform has never been tested in combination with behavioral and structural interventions.

Offering behavioral interventions (BIs) within a YFHS platform could further enhance service uptake and address other behavioral risks and psychosocial outcomes. The social context of intimate relationships in SSA is characterized by severe gender inequality. Gender norms favor male control over sexual intercourse, often leaving young women with less power in sexual decision-making.<sup>7-10</sup> Additionally, many young women have older male partners, frequently with a transactional dimension, who are more likely to be HIV-infected.<sup>11-15</sup> BIs based on the theory of gender and power,<sup>16,17</sup> and social cognitive theory<sup>18</sup> have been shown to address these power imbalances and reduce multiple partnerships, HSV-2 incidence, and IPV.<sup>19-21</sup> All of these evidence-based interventions address gender norms and involve participatory activities for groups of young women. Synthesizing the most effective elements of these “empowerment” interventions and offering them within a YFHS service delivery platform could

1  
2  
3 help reduce behavioral sources of risk, improve psychosocial outcomes, and generate demand for health  
4 services. Assessing evidence-based clinical and behavioral interventions is a critical next step.  
5  
6

7  
8 Cash transfers are also a promising tool for preventing HIV among AGYW.<sup>22-24</sup> In Malawi, when  
9 cash payments were given to girls and their guardians they were more likely to remain in school, less  
10 likely to report age-disparate relationships, and have lower HIV and HSV-2 prevalence.<sup>22</sup> In South Africa,  
11 adolescents living in homes receiving a national child grant reported half the incidence of transactional  
12 sex and much less age-disparate sex than those in homes not receiving it.<sup>23</sup> In a South African trial, cash  
13 transfers conditioned on schooling did not lead to lowered HIV incidence, but did lead to reductions in  
14 intimate partner violence and sexual risk.<sup>25</sup> However, to our knowledge, a cash transfer program has not  
15 been evaluated for AGYW in a clinical environment, nor has it been implemented in combination with a  
16 behavioral intervention. Understanding whether a cash transfer provides benefits in combination with a  
17 YFHS service delivery platform and empowerment-based BI is not known.  
18  
19  
20  
21  
22  
23  
24  
25  
26  
27  
28

29  
30 It is becoming widely acknowledged that combination HIV prevention packages that include  
31 effective, acceptable, and scalable clinical, socio-behavioral and structural interventions may have the  
32 greatest impact.<sup>26-29</sup> However, it is not known how best to combine different intervention levels for  
33 maximal effectiveness for multiple outcomes. The Girl Power study is designed to compare three  
34 different combinations of evidence-based interventions to one another and to a standard of care and to  
35 assess their impact on a range of care-seeking and sexual risk behaviors in two sub-Saharan African  
36 countries.  
37  
38  
39  
40  
41  
42  
43  
44  
45

## 46 **Methods and Analysis**

### 47 *Study Setting*

48  
49  
50 The Girl Power study is an ongoing study (February 2016-November 2017) being conducted in  
51 Malawi and South Africa. These countries represent two prototypical, yet distinct sub-Saharan African  
52 contexts. In Malawi, based on nationally representative household data, first births often occur early, at a  
53 median age of 19 years, and within the context of marriage.<sup>30</sup> In South Africa, sexual activity tends to be  
54  
55  
56  
57  
58  
59  
60

1  
2  
3 outside of the context of marriage, with a somewhat later age of first birth.<sup>31,32</sup> Malawi is characterized by  
4 extreme poverty with the majority of the population living on less than \$1 per day, whereas South Africa  
5 has extreme wealth disparities. In spite of these socio-economic differences, both countries have high  
6 HIV prevalence levels—6% of women 20-24 years old are HIV-infected in Malawi and 17% in South  
7 Africa, rates considerably higher than their male counterparts.<sup>30</sup> Sexual violence is also a serious problem  
8 in both countries, with high rates of non-consensual sex reported by young women.<sup>33-35</sup> Additionally, both  
9 have public sector health facilities with human resource shortages, stock-outs of pharmaceuticals and  
10 supplies, long queues, and providers who exhibit negative attitudes towards AGYW. It was within these  
11 contexts that the Girl Power study was conceptualized.

12  
13  
14  
15  
16  
17  
18  
19  
20  
21  
22  
23 Four comparable public sector health facilities were selected in each country. In Malawi, the four  
24 sites are public-sector health centers in Lilongwe. All sites are on a main road, have antenatal volumes  
25 >200 clients per month, and have antenatal HIV prevalence  $\geq 5\%$ . These sites have higher HIV prevalence  
26 than the surrounding rural areas where antenatal HIV prevalence is  $< 5\%$ . In South Africa, the four sites  
27 are in the Klipfontein and Mitchell's Plain areas in the Western Cape, which serve primarily black and  
28 coloured populations. These are high-density, low socioeconomic peri-urban townships comprised  
29 predominantly of informal dwellings. Antenatal prevalence in the Western Cape is 17%. In both  
30 countries, each clinic serves distinct communities. In South Africa, biometric identification is being used  
31 to ensure the same people do not enroll in more than one site. In Malawi, all sites are at least 7km apart.

32  
33  
34  
35  
36  
37  
38  
39  
40  
41  
42  
43 Prior to the study, all sites in both countries offered free HIV testing and counseling (HTC),  
44 contraception, and STI services in separate locations within each clinic with separate queues. Condoms  
45 were also available for free at all sites—in the pharmacy at the Malawian sites and throughout the clinic at  
46 the South African sites. At all sites in both countries AGYW could receive general health services with  
47 the general population. However, there were no distinct YFHS spaces, times, or providers, no behavioral  
48 interventions (BIs), and no opportunities for CCTs within the clinic.

### *Study Design and Interventions*

Girl Power is a quasi-experimental prospective cohort study comparing four different models of service delivery and their impacts on care-seeking and sexual risk behaviors among AGYW (Figure 1).

The primary outcomes of interest are service uptake and behavioral risks. Participants enrolled at all sites will complete behavioral surveys at baseline, six, and twelve months and have their clinical data ascertained over a one-year period. In each country, each clinic was randomly assigned to one of the following models of care:

- Model 1: Standard of care (SOC): The SOC offers HTC, contraception, STI syndromic management and condoms to AGYW. However, health care providers have not been trained in YFHS and clinics have not made YFHS modifications, regarding hours, clinic navigation, integration, cost, or space.
- Model 2: YFHS: HTC, contraception, and STI services are offered by health providers who have been trained in YFHS. YFHS modifications have been made to the clinics, including clinic navigation (both countries), a youth-only space with integrated service provision (Malawi), and longer hours (Malawi).
- Model 3: YFHS + BI: In addition to the YFHS package, participants can attend twelve monthly facilitator-led, small-group interactive sessions. They are based on other evidence-based interventions from the region,<sup>17,19,21</sup> and are motivated by the theory of gender and power and Social Cognitive Theory. These sessions address sexual health topics (e.g. HIV, reproductive health), social issues (e.g. partner communication, peer pressure, and intimate partner violence), financial literacy (e.g. budgeting, saving, and investing), and general topics (e.g. self-esteem, goal-setting, and decision-making). Each session includes an activity to do at home after the session in order to encourage behavior change. Each country adapted curricula in a culturally-responsive manner; although sessions were not identical across countries, they explore similar themes. We expect sessions will be delivered to groups of 10-20 girls at once.

- 1  
2  
3  
4  
5  
6  
7  
8  
9  
10  
11  
12  
13
- Model 4: YFHS + BI + conditional cash transfer (CCT): In addition to the YFHS package and empowerment sessions, AGYW received a monthly CCT (approximately \$6) conditional on attending the monthly empowerment session. Each young woman could receive up to 12 CCTs (one per month). In Malawi, the CCT is being provided in physical cash and in South Africa the CCT is provided electronically.

14 Study and clinical personnel, training activities, and clinical modifications by country and model are  
15 described in greater detail in Table 1.  
16  
17  
18  
19

### 20 *Study Population*

21 At each of the eight sites, 250 AGYW will be recruited and followed for one year. Eligibility  
22 criteria include being female, 15-24 years old, residing in the clinic's catchment area, and willing to be  
23 enrolled for a one-year period. The intention is to recruit AGYW who are already sexually active or likely  
24 to become sexually active, although this is not a strict eligibility criterion. In total, 1000 AGYW will be  
25 enrolled in each country (N=2000 total).  
26  
27  
28  
29  
30  
31  
32

33 Recruitment will occur through comparably at each site through a combination of community  
34 outreach activities, self-referral, and referral through invitations from other participants. Outreach workers  
35 will visit parts of the catchment area known to be high-risk. Through one-on-one conversations they will  
36 build rapport, assess sexual activity and past care-seeking behaviors, promote the services at their site,  
37 and invite them to participate. AGYW who enroll in the study will be provided with invitations to invite  
38 friends who they believe would also benefit.  
39  
40  
41  
42  
43  
44  
45

46 Follow-up phone and physical tracing will be conducted for girls who miss their six or twelve  
47 month visits. We will make comparable attempts to trace participants at all four clinics to avoid  
48 differential loss-to-follow-up and provide the same transport reimbursement for the three research visits  
49 across all four sites. These efforts are designed to minimize differential loss-to-follow-up.  
50  
51  
52  
53  
54  
55  
56  
57  
58  
59  
60



1  
2  
3  
4  
5  
6  
7  
8  
9  
10  
11  
12  
13  
14  
15  
16  
17  
18  
19  
20  
21  
22  
23  
24  
25  
26  
27  
28  
29  
30  
31  
32  
33  
34  
35  
36  
37  
38  
39  
40  
41  
42  
43  
44  
45  
46  
47  
48  
49

**Table 1. Girl Power Personnel, Training and Clinical Modifications by Clinic and Country**

|                                  | Malawi                                                                                                                                                |                                                                                                                                                                                                                                                                          |                                                                            |             | South Africa                                                                                                                                                                   |                                                                                      |                                                                     |             |
|----------------------------------|-------------------------------------------------------------------------------------------------------------------------------------------------------|--------------------------------------------------------------------------------------------------------------------------------------------------------------------------------------------------------------------------------------------------------------------------|----------------------------------------------------------------------------|-------------|--------------------------------------------------------------------------------------------------------------------------------------------------------------------------------|--------------------------------------------------------------------------------------|---------------------------------------------------------------------|-------------|
|                                  | Model 1                                                                                                                                               | Model 2                                                                                                                                                                                                                                                                  | Model 3                                                                    | Model 4     | Model 1                                                                                                                                                                        | Model 2                                                                              | Model 3                                                             | Model 4     |
| Clinical model                   | SOC                                                                                                                                                   | YFHS                                                                                                                                                                                                                                                                     | YFHS+BI                                                                    | YFHS+BI+CCT | SOC                                                                                                                                                                            | YFHS                                                                                 | YFHS+BI                                                             | YFHS+BI+CCT |
| <b>Personnel</b>                 |                                                                                                                                                       |                                                                                                                                                                                                                                                                          |                                                                            |             |                                                                                                                                                                                |                                                                                      |                                                                     |             |
| Research                         | <u>Research assistant:</u> Young (<29) female full-time staff responsible for all consenting, screening, enrolment, and behavioral surveys (1/clinic) |                                                                                                                                                                                                                                                                          |                                                                            |             | <u>Research assistant:</u> Female full-time staff responsible for all consenting, screening, enrolment, and behavioral surveys (1/clinic)                                      |                                                                                      |                                                                     |             |
| Outreach                         | <u>Peer outreach workers:</u> Young full-time lay staff responsible for recruitment and retention activities. (2/clinic)                              | <u>Peer outreach workers/navigators:</u> Young full-time lay staff responsible for recruitment and retention activities (outreach roles). They also welcome participants, assess their sexual and reproductive health needs, and help with clinic navigation. (2/clinic) |                                                                            |             | <u>Peer Outreach workers:</u> Temporary staff responsible for community outreach and recruitment at study initiation (2/clinic)                                                |                                                                                      |                                                                     |             |
| Navigation                       | -                                                                                                                                                     |                                                                                                                                                                                                                                                                          |                                                                            |             | <u>Peer navigator:</u> Full-time staff who welcome participants, discuss sexual and reproductive health needs, fetch patient files, and help with clinic navigation (1/clinic) |                                                                                      |                                                                     |             |
| Family planning and STI services | -                                                                                                                                                     | <u>Nurses:</u> 4-5 government nurses from these sites were assigned to rotate through a youth-focused Girl Power clinic.                                                                                                                                                 |                                                                            |             | -                                                                                                                                                                              | <u>Nurses:</u> 1-3 government nurses provide SRH services to Girl Power participants |                                                                     |             |
| HIV counseling and testing       |                                                                                                                                                       | <u>Counselor:</u> 1 young female HIV counselor was assigned to the Girl Power clinic.                                                                                                                                                                                    |                                                                            |             | <u>Counselor:</u> 1-3 government HTC counselors are available to attend to Girl Power participants                                                                             |                                                                                      |                                                                     |             |
| Workshop facilitation            | -                                                                                                                                                     | -                                                                                                                                                                                                                                                                        | <u>Facilitators:</u> Young females lead empowerment sessions (1/facility). |             | -                                                                                                                                                                              | -                                                                                    | <u>Facilitators:</u> Females lead empowerment sessions (1/facility) |             |
| <b>Training</b>                  |                                                                                                                                                       |                                                                                                                                                                                                                                                                          |                                                                            |             |                                                                                                                                                                                |                                                                                      |                                                                     |             |
| Protocol training                |                                                                                                                                                       | Study overview and design, clinical data collection, Good Clinical Practice (3 days) (all staff)                                                                                                                                                                         |                                                                            |             | Study overview and design, data collection, sexual and reproductive health refresher, values clarification (1-2 days)                                                          |                                                                                      |                                                                     |             |
| YFHS training                    |                                                                                                                                                       | Medical and psychosocial support for adolescents (2 day) (all staff)                                                                                                                                                                                                     |                                                                            |             | -                                                                                                                                                                              | Medical and psychosocial support for adolescents (1 day) (all staff)                 |                                                                     |             |
| Clinical training                |                                                                                                                                                       | Nurses trained on long-acting reversible contraception (5 days) and STI syndromic management (5 days)                                                                                                                                                                    |                                                                            |             | All nurses expected to be familiar with these provision of all contraceptive methods and STI syndromic management. Provided on-the-job training.                               |                                                                                      |                                                                     |             |
| <b>Clinical Modifications</b>    |                                                                                                                                                       |                                                                                                                                                                                                                                                                          |                                                                            |             |                                                                                                                                                                                |                                                                                      |                                                                     |             |
| Space                            | -                                                                                                                                                     | Dedicated space for AGYW service delivery in a separate area from general clinic to ensure privacy from adults                                                                                                                                                           |                                                                            |             | -                                                                                                                                                                              | Dedicated waiting and/or welcome area for AGYW                                       |                                                                     |             |
| Hours                            | Typically morning hours                                                                                                                               | AGYW can come in the morning or afternoon                                                                                                                                                                                                                                |                                                                            |             | AGYW can come in the morning or afternoon                                                                                                                                      |                                                                                      |                                                                     |             |
| Cost                             | STI medications require payment                                                                                                                       | All services are free                                                                                                                                                                                                                                                    |                                                                            |             | All services are free                                                                                                                                                          |                                                                                      |                                                                     |             |

### *Data Collection and Management*

The two primary sources of data collection are a detailed behavioral survey and clinical service records. The behavioral survey is administered at three time points—at study enrollment, month six, and month 12. The behavioral survey contains questions about demographics, socio-economic status, past and current care-seeking behaviors, sexual history, depression (10-item Center for Epidemiologic Studies of Depression scale), intimate partner violence (Modified Conflict Tactic Scale), alcohol consumption (NIAAA brief alcohol screening tool). The twelve-month assessment also includes assessments of the BI and the CCT. The behavioral survey will be self-administered in South Africa, except among illiterate participants; for these participants it will be interviewer-administered. In Malawi it will be interviewer-administered to all participants by young female research assistants. All surveys will be administered on encrypted password-protected Android tablets using Open Data Kit software and stored on secure servers.

In both countries, we will document delivery of HTC, family planning, and STI services. Due to the unique clinical contexts, data collection will occur differently in the two countries. In Malawi, a clinic card that contains all clinical information has been developed for the study and will be used by clinical staff at each patient encounter and housed at the clinic. In South Africa, clinical staff will record clinical activities in existing clinical records and study staff will transcribe this information onto a study-specific form. In both countries, these data will then be entered into tablets in ODK by trained research assistants. In all clinics, study staff will systematically examine clinical records to ensure consistent ascertainment.

In both countries, each participant will be identified through a unique identifier. In South Africa, participants' identities will be verified through biometric data.

### *Study outcomes, analytic methods, and sample size*

The primary clinical outcomes are care-seeking behaviors using clinical data. Within each quarter, we will compare the proportion of participants who received HTC, male and/or female condoms, hormonal or long-acting contraception, and both condoms and another form of contraception. We will also explore the proportion of participants who receive STI services. For all of these services, we will

1  
2  
3 assess the proportion of participants who use each method ever, in each quarter, and in all quarters. These  
4  
5 data are available both through clinical abstraction, the primary measure of clinical effectiveness. Details  
6  
7 are reported in Table 2.  
8  
9

10 HIV risk behaviors collected on the behavioral survey are primary behavioral outcomes of  
11  
12 interest. Questions of particular interest are the proportion of AGYW who have multiple sexual partners,  
13  
14 have a considerably older male partner, and experience IPV. We will compare these indicators between  
15  
16 participants in each country in each model.  
17  
18

19 Table 2. Primary outcome measures

|                                         | Data source       | Time period                    | Numerator                                                                                                            | Denominator                                        |
|-----------------------------------------|-------------------|--------------------------------|----------------------------------------------------------------------------------------------------------------------|----------------------------------------------------|
| <b>Primary clinical outcomes</b>        |                   |                                |                                                                                                                      |                                                    |
| HIV testing uptake                      | Clinical record   | Quarter 1, 2, 3,4, ever, all   | Number with an HIV test recorded in each period                                                                      | Persons HIV-negative or HIV-unknown in that period |
| Condom uptake                           | Clinical record   | Quarter 1, 2, 3,4, ever, all   | Number who received condoms in each period                                                                           | Full cohort                                        |
| Contraceptive uptake                    | Clinical record   | Quarter 1, 2, 3,4, ever, all 4 | Number who received contraceptive pills or injections or received/continued long-acting contraception in each period | Full cohort                                        |
| Dual method uptake                      | Clinical record   | Quarter 1, 2, 3,4, ever, all   | Number with condom and contraceptive uptake in each period                                                           | Full cohort                                        |
| <b>Primary sexual behavior outcomes</b> |                   |                                |                                                                                                                      |                                                    |
| Age disparate sex                       | Behavioral survey | 12 months                      | Number reporting at least one current partner $\geq 10$ years older                                                  | Number who took 12 month behavioral survey         |
| Multiple partners in the last year      | Behavioral survey | 12 months                      | Number reporting $>1$ sexual partner in the last year                                                                | Number who took 12 month behavioral survey         |
| Physical IPV                            | Behavioral survey | 6 and 12 months                | Number reporting physical IPV in that period                                                                         | Number who took 6, 12 month behavioral surveys     |
| Sexual IPV                              | Behavioral survey | 6 and 12 months                | Number reporting physical IPV in that period                                                                         | Number who took 6, 12 month behavioral surveys     |
| Emotional IPV                           | Behavioral survey | 6 and 12 months                | Number reporting physical IPV in that period                                                                         | Number who took 6, 12 month behavioral surveys     |

20  
21  
22  
23  
24  
25  
26  
27  
28  
29  
30  
31  
32  
33  
34  
35  
36  
37 For all primary clinical outcomes, we will conduct an intention to treat analysis, analyzing each  
38  
39 participant in her assigned clinic and assessing whether she received services in that clinic. We will use  
40  
41 generalized estimating equations to account for correlated records between each participant at each time  
42  
43 point. A log or identity link, binomial distribution, and robust variance estimates will be used to estimate  
44  
45  
46  
47  
48  
49  
50  
51  
52  
53  
54  
55  
56  
57  
58  
59  
60

1  
2  
3 risk ratios and risk differences and ninety-five percent confidence intervals. We will compare absolute  
4  
5 differences at each time point, as well as changes over time.  
6

7  
8 In Stata 12.0, we conducted two-sample tests of proportions to determine how much statistical  
9  
10 power would be available to detect differences between any two arms at any time point within each  
11  
12 country. Using an alpha level of 0.05 and a sample size of 250 participants per model we have >80%  
13  
14 power to detect differences  $\geq 13\%$  between any two models at any time point.  
15

### 16 17 18 *Qualitative Sub-study* 19

20  
21 A qualitative sub-study will be conducted to better understand participant experiences with each  
22  
23 service delivery model. Twelve to 15 in-depth interviews (IDIs) will be conducted at each site in each  
24  
25 country (N=96-120 IDIs total). IDIs will focus on individual experiences with SOC, YFHS, BI, and CCT.  
26  
27 At each clinic we will purposively select a mixture of good care-seekers, poor-care-seekers, and HIV-  
28  
29 infected young women. Focus group discussions (FGDs) (N=2-3/site) will address norms surrounding  
30  
31 these same topics and strategies for improving or enhancing these services. At each site, we will have at  
32  
33 least one FGD with adolescent girls 15-19 years old and one with young women 20-24 years old. IDIs  
34  
35 and FGDs will be conducted in Chichewa in Malawi and in isiXhosa or English in South Africa. All IDIs  
36  
37 and FGDs will be transcribed and translated into English. They will be coded and analyzed using a  
38  
39 thematic approach.  
40  
41  
42  
43  
44

### 45 **Ethics and Dissemination** 46

47  
48 This study was approved by the University of North Carolina Institutional Review Board (IRBIS  
49  
50 15-2901) and two local regulatory bodies: the Malawi National Health Sciences Research Committee  
51  
52 (15/7/1447) and the University of Cape Town Human Research Ethics Committee (815/2015). In South  
53  
54 Africa, all AGYW 15-24 years could decide whether to provide informed consent for themselves; those  
55  
56 15-17 years could seek optional parental consent. We requested that minors 15-17 years be able to  
57  
58 consent for themselves because they are able to receive all of these clinical services without parental  
59  
60

1  
2  
3 consent. In a study designed to reduce barriers to care-seeking, obtaining parental consent could pose an  
4 undue barrier. In Malawi, AGYW 18-24 years will provide informed consent for themselves. AGYW 15-  
5  
6  
7 17 years will provide assent and have a parent, guardian, or authorized representative provide informed  
8  
9 consent. We requested that minors be able to consent as adults, but this provision was denied. At each  
10  
11 site, a community club of individuals  $\geq 18$  years who could serve as authorized representatives will be  
12  
13 established.

14  
15  
16       Dissemination activities will occur at all stages of the study: prior to implementation, at  
17  
18 intermediate points during implementation, and at study culmination. Prior to study implementation,  
19  
20 meetings were held with key local stakeholders, such as local health leadership (e.g. district, province, or  
21  
22 city managers), clinical supervisors, and clinical staff. These meetings were designed to seek permission  
23  
24 for study implementation, orient these stakeholders to study goals, and work together on implementation  
25  
26 questions. Sensitization activities were also conducted with key community stakeholders, such as local  
27  
28 chiefs and religious leaders, school headmasters, and library managers. These sensitizations were  
29  
30 designed to inform key local leaders about the study, elicit buy-in and support, and facilitate recruitment.  
31  
32 During study implementation, these same stakeholders will be engaged to report on study progress and  
33  
34 discuss challenges. At the end of the study, results will be disseminated so that stakeholders and  
35  
36 participants are aware of the study's primary findings. Additionally, in both countries, we have oriented  
37  
38 policy-makers and implementing partners to study goals and progress. Results will be disseminated in  
39  
40 peer-reviewed journals and at national and international meetings and conferences. Dissemination of final  
41  
42 results is expected in 2018.  
43  
44  
45  
46  
47

## 48 **Conclusion**

49  
50       Implementing combination interventions for HIV prevention among AGYW in SSA has become  
51  
52 a major focus of governments and donors over the last several years. In most cases however, programs  
53  
54 have not been rigorously evaluated for impact. Girl Power is expected to address this important gap in  
55  
56  
57  
58  
59  
60

1  
2  
3 understanding and provide greater insights into how to support vulnerable AGYW related to SRH and  
4  
5 HIV in SSA.  
6  
7

### 8 9 **Author Contributions**

10 NER, AEP, LGB, and LM designed the study. Other co-authors are responsible for study coordination,  
11  
12 implementation, and analysis. All authors either wrote or made substantial edits to the draft, approved the  
13  
14 final version and take responsibility for the work.  
15  
16  
17  
18  
19  
20  
21  
22  
23  
24

### 25 **Funding Statement**

26  
27 The Girl Power study is funded by Evidence for HIV Prevention in Southern Africa (EHPSA), a DFID  
28  
29 program managed by Mott MacDonald. N.E.R. is supported by the National Institutes of Health (R00  
30  
31 MH104154).  
32  
33  
34  
35

### 36 **Competing Interests Statement**

37  
38 We have no competing interests to declare.  
39  
40  
41  
42  
43  
44  
45  
46  
47  
48  
49  
50  
51  
52  
53  
54  
55  
56  
57  
58  
59  
60

## References

1. Napierala Mavedzenge SM, Doyle AM, Ross DA. HIV prevention in young people in sub-Saharan Africa: a systematic review. *The Journal of adolescent health : official publication of the Society for Adolescent Medicine*. Dec 2011;49(6):568-586.
2. Mavedzenge SN, Luecke E, Ross DA. Effective approaches for programming to reduce adolescent vulnerability to HIV infection, HIV risk, and HIV-related morbidity and mortality: a systematic review of systematic reviews. *Journal of acquired immune deficiency syndromes*. Jul 1 2014;66 Suppl 2:S154-169.
3. Denno DM, Hoopes AJ, Chandra-Mouli V. Effective strategies to provide adolescent sexual and reproductive health services and to increase demand and community support. *The Journal of adolescent health : official publication of the Society for Adolescent Medicine*. Jan 2015;56(1 Suppl):S22-41.
4. Chandra-Mouli V, McCarraher DR, Phillips SJ, Williamson NE, Hainsworth G. Contraception for adolescents in low and middle income countries: needs, barriers, and access. *Reproductive health*. 2014;11(1):1.
5. Mbonye AK. Disease and health seeking patterns among adolescents in Uganda. *International journal of adolescent medicine and health*. Apr-Jun 2003;15(2):105-112.
6. Ross DA, Chagalucha J, Obasi AI, et al. Biological and behavioural impact of an adolescent sexual health intervention in Tanzania: a community-randomized trial. *Aids*. Sep 12 2007;21(14):1943-1955.
7. MacPhail C, Campbell C. 'I think condoms are good but, aai, I hate those things': condom use among adolescents and young people in a Southern African township. *Social Science & Medicine*. 2001;52:1613-1627.
8. Harrison A, Xaba N, Kunene P. Understanding safe sex: gender narratives of HIV and pregnancy prevention by rural South African school going youth. *Reproductive health matters*. 2001;9(17):63-71.

- 1  
2  
3  
4  
5  
6  
7  
8  
9  
10  
11  
12  
13  
14  
15  
16  
17  
18  
19  
20  
21  
22  
23  
24  
25  
26  
27  
28  
29  
30  
31  
32  
33  
34  
35  
36  
37  
38  
39  
40  
41  
42  
43  
44  
45  
46  
47  
48  
49  
50  
51  
52  
53  
54  
55  
56  
57  
58  
59  
60
9. Pettifor A, Macphail C, Anderson AD, Maman S. 'If I buy the Kellogg's then he should [buy] the milk': young women's perspectives on relationship dynamics, gender power and HIV risk in Johannesburg, South Africa. *Cult Health Sex*. 2012;14(5):477-490.
10. Jaspan HB, Flisher AJ, Myer L, et al. Sexual health, HIV risk, and retention in an adolescent HIV-prevention trial preparatory cohort. *The Journal of adolescent health : official publication of the Society for Adolescent Medicine*. Jul 2011;49(1):42-46.
11. Dunkle KL, Jewkes RK, Brown HC, Gray GE, McIntyre JA, Harlow SD. Gender-based violence, relationship power, and risk of HIV infection in women attending antenatal clinics in South Africa. *Lancet*. May 1 2004;363(9419):1415-1421.
12. Pettifor A, Measham D, Rees H, Padian N. Sexual power and HIV risk, South Africa. *Emerging infectious diseases*. 2004;10(11):1996-2004.
13. Gilbert L, Raj A, Hien D, Stockman J, Terlikbayeva A, Wyatt G. Targeting the SAVA (Substance Abuse, Violence, and AIDS) Syndemic Among Women and Girls: A Global Review of Epidemiology and Integrated Interventions. *Journal of acquired immune deficiency syndromes*. Jun 1 2015;69 Suppl 2:S118-127.
14. Wamoyi J, Stobeanau K, Bobrova N, Abramsky T, Watts C. Transactional sex and risk for HIV infection in sub-Saharan Africa: a systematic review and meta-analysis. *Journal of the International AIDS Society*. 2016;19(1):20992.
15. Dunkle KL, Jewkes RK, Brown HC, Gray GE, McIntyre JA, Harlow SD. Transactional sex among women in Soweto, South Africa: prevalence, risk factors and association with HIV infection. *Social science & medicine*. Oct 2004;59(8):1581-1592.
16. Wingood GM, Scd, DiClemente RJ. Application of the theory of gender and power to examine HIV-related exposures, risk factors, and effective interventions for women. *Health education & behavior : the official publication of the Society for Public Health Education*. Oct 2000;27(5):539-565.



- 1  
2  
3  
4  
5  
6  
7  
8  
9  
10  
11  
12  
13  
14  
15  
16  
17  
18  
19  
20  
21  
22  
23  
24  
25  
26  
27  
28  
29  
30  
31  
32  
33  
34  
35  
36  
37  
38  
39  
40  
41  
42  
43  
44  
45  
46  
47  
48  
49  
50  
51  
52  
53  
54  
55  
56  
57  
58  
59  
60
17. Wingood GM, Reddy P, Lang DL, et al. Efficacy of SISTA South Africa on sexual behavior and relationship control among isiXhosa women in South Africa: results of a randomized-controlled trial. *Journal of acquired immune deficiency syndromes*. Jun 1 2013;63 Suppl 1:S59-65.
  18. Bandura A. Social cognitive theory: an agentic perspective. *Annual review of psychology*. 2001;52:1-26.
  19. Jewkes R, Nduna M, Levin J, et al. Impact of stepping stones on incidence of HIV and HSV-2 and sexual behaviour in rural South Africa: cluster randomised controlled trial. *Bmj*. 2008;337:a506.
  20. Jewkes RK, Dunkle K, Nduna M, Shai N. Intimate partner violence, relationship power inequity, and incidence of HIV infection in young women in South Africa: a cohort study. *Lancet*. Jul 3 2010;376(9734):41-48.
  21. Abramsky T, Devries K, Kiss L, et al. A community mobilisation intervention to prevent violence against women and reduce HIV/AIDS risk in Kampala, Uganda (the SASA! Study): study protocol for a cluster randomised controlled trial. *Trials*. 2012;13:96.
  22. Baird SJ, Garfein RS, McIntosh CT, Ozler B. Effect of a cash transfer programme for schooling on prevalence of HIV and herpes simplex type 2 in Malawi: a cluster randomised trial. *Lancet*. Apr 7 2012;379(9823):1320-1329.
  23. Cluver L, Orkin M, Boyes M, Sherr L. The child support grant and adolescent risk of HIV infection in South Africa--authors' reply. *The Lancet. Global health*. Apr 2014;2(4):e200.
  24. Pettifor A, MacPhail C, Nguyen N, Rosenberg M. Can money prevent the spread of HIV? A review of cash payments for HIV prevention. *AIDS and behavior*. Oct 2012;16(7):1729-1738.
  25. Pettifor A, MacPhail C, Hughes JP, et al. The effect of a conditional cash transfer on HIV incidence in young women in rural South Africa (HPTN 068): a phase 3, randomised controlled trial. *The Lancet. Global health*. Dec 2016;4(12):e978-e988.

- 1  
2  
3  
4  
5  
6  
7  
8  
9  
10  
11  
12  
13  
14  
15  
16  
17  
18  
19  
20  
21  
22  
23  
24  
25  
26  
27  
28  
29  
30  
31  
32  
33  
34  
35  
36  
37  
38  
39  
40  
41  
42  
43  
44  
45  
46  
47  
48  
49  
50  
51  
52  
53  
54  
55  
56  
57  
58  
59  
60
26. Cluver LD, Orkin FM, Boyes ME, Sherr L. Cash plus care: social protection cumulatively mitigates HIV-risk behaviour among adolescents in South Africa. *Aids*. Jul 2014;28 Suppl 3:S389-397.
27. Vermund SH, Hayes RJ. Combination prevention: new hope for stopping the epidemic. *Current HIV/AIDS reports*. Jun 2013;10(2):169-186.
28. Cluver LD, Orkin FM, Yakubovich AR, Sherr L. Combination Social Protection for Reducing HIV-Risk Behavior Among Adolescents in South Africa. *Journal of acquired immune deficiency syndromes*. May 1 2016;72(1):96-104.
29. Merson M, Padian N, Coates TJ, et al. Combination HIV prevention. *Lancet*. Nov 22 2008;372(9652):1805-1806.
30. National\_Statistics\_Office\_Malawi, ICF. *Malawi Demographic and Health Survey 2015-2016*. Zomba, Malawi and Rockville, Maryland, USA2017.
31. MacPhail C, Pettifor AE, Pascoe S, Rees HV. Contraception use and pregnancy among 15-24 year old South African women: a nationally representative cross-sectional survey. *BMC medicine*. 2007;5:31.
32. Statistics South Africa. *Census 2011: Fertility in South Africa*. Pretoria, South Africa 2015.
- . Dunkle KL, Jewkes HC, Brown, et al. Prevalence and patterns of gender-based violence and revictimization among women attending antenatal clinics in Soweto, South Africa. *American Journal of Epidemiology*. 2004;160:230-239.
34. Jewkes R, Sikweyiya Y, Morrell R, et al. *Understanding men's health and use of violence: interface of rape and HIV in South Africa*. Medical Research Council, Pretoria, South Africa, 2009.
35. *Violence against children and young women in Malawi: Findings from a national survey, 2013*. UNICEF, 2014.

1  
2  
3  
4  
5  
6  
7  
8  
9  
10  
11  
12  
13  
14  
15  
16  
17  
18  
19  
20  
21  
22  
23  
24  
25  
26  
27  
28  
29  
30  
31  
32  
33  
34  
35  
36  
37  
38  
39  
40  
41  
42  
43  
44  
45  
46  
47  
48  
49  
50  
51  
52  
53  
54  
55  
56  
57  
58  
59  
60

**Figure 1 Legend:** Figure 1 depicts the study design.

For peer review only

1  
2  
3  
4  
5  
6  
7  
8  
9  
10  
11  
12  
13  
14  
15  
16  
17  
18  
19  
20  
21  
22  
23  
24  
25  
26  
27  
28  
29  
30  
31  
32  
33  
34  
35  
36  
37  
38  
39  
40  
41  
42  
43  
44  
45  
46  
47  
48  
49  
50  
51  
52  
53  
54  
55  
56  
57  
58  
59  
60

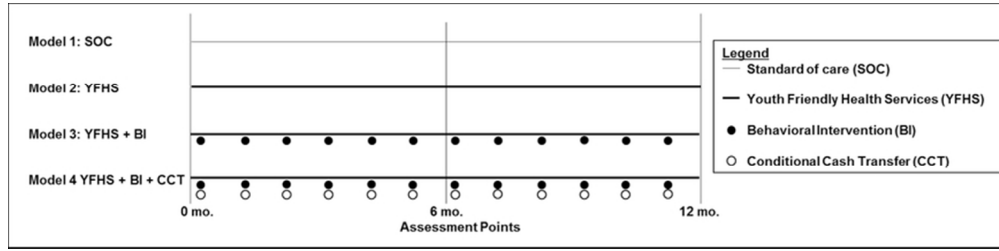

Figure 1 depicts the study design.

73x18mm (300 x 300 DPI)

For peer review only

STROBE 2007 (v4) Statement—Checklist of items that should be included in reports of *cohort studies*

| Section/Topic                | Item # | Recommendation                                                                                                                                                                       | Reported on page # |
|------------------------------|--------|--------------------------------------------------------------------------------------------------------------------------------------------------------------------------------------|--------------------|
| Title and abstract           | 1      | (a) Indicate the study's design with a commonly used term in the title or the abstract                                                                                               | 1,2                |
|                              |        | (b) Provide in the abstract an informative and balanced summary of what was done and what was found                                                                                  | 2                  |
| <b>Introduction</b>          |        |                                                                                                                                                                                      |                    |
| Background/rationale         | 2      | Explain the scientific background and rationale for the investigation being reported                                                                                                 | 4-5                |
| Objectives                   | 3      | State specific objectives, including any pre-specified hypotheses                                                                                                                    | 5                  |
| <b>Methods</b>               |        |                                                                                                                                                                                      |                    |
| Study design                 | 4      | Present key elements of study design early in the paper                                                                                                                              | 6-8                |
| Setting                      | 5      | Describe the setting, locations, and relevant dates, including periods of recruitment, exposure, follow-up, and data collection                                                      | 5-6                |
| Participants                 | 6      | (a) Give the eligibility criteria, and the sources and methods of selection of participants. Describe methods of follow-up                                                           | 10                 |
|                              |        | (b) For matched studies, give matching criteria and number of exposed and unexposed                                                                                                  | NA                 |
| Variables                    | 7      | Clearly define all outcomes, exposures, predictors, potential confounders, and effect modifiers. Give diagnostic criteria, if applicable                                             | 10-12              |
| Data sources/<br>measurement | 8*     | For each variable of interest, give sources of data and details of methods of assessment (measurement). Describe comparability of assessment methods if there is more than one group | 10-12              |
| Bias                         | 9      | Describe any efforts to address potential sources of bias                                                                                                                            | 12                 |
| Study size                   | 10     | Explain how the study size was arrived at                                                                                                                                            | 12                 |
| Quantitative variables       | 11     | Explain how quantitative variables were handled in the analyses. If applicable, describe which groupings were chosen and why                                                         | 11                 |
| Statistical methods          | 12     | (a) Describe all statistical methods, including those used to control for confounding                                                                                                | 11                 |
|                              |        | (b) Describe any methods used to examine subgroups and interactions                                                                                                                  | NA                 |
|                              |        | (c) Explain how missing data were addressed                                                                                                                                          | NA                 |
|                              |        | (d) If applicable, explain how loss to follow-up was addressed                                                                                                                       | NA                 |
|                              |        | (e) Describe any sensitivity analyses                                                                                                                                                | NA                 |
| <b>Results</b>               |        |                                                                                                                                                                                      |                    |

|                          |     |                                                                                                                                                                                                                                                                                                                                                                                                               |    |
|--------------------------|-----|---------------------------------------------------------------------------------------------------------------------------------------------------------------------------------------------------------------------------------------------------------------------------------------------------------------------------------------------------------------------------------------------------------------|----|
| Participants             | 13* | (a) Report numbers of individuals at each stage of study—eg numbers potentially eligible, examined for eligibility, confirmed eligible, included in the study, completing follow-up, and analysed<br>(b) Give reasons for non-participation at each stage<br>(c) Consider use of a flow diagram                                                                                                               | NA |
| Descriptive data         | 14* | (a) Give characteristics of study participants (eg demographic, clinical, social) and information on exposures and potential confounders<br>(b) Indicate number of participants with missing data for each variable of interest<br>(c) Summarise follow-up time (eg, average and total amount)                                                                                                                |    |
| Outcome data             | 15* | Report numbers of outcome events or summary measures over time                                                                                                                                                                                                                                                                                                                                                |    |
| Main results             | 16  | (a) Give unadjusted estimates and, if applicable, confounder-adjusted estimates and their precision (eg, 95% confidence interval). Make clear which confounders were adjusted for and why they were included<br>(b) Report category boundaries when continuous variables were categorized<br>(c) If relevant, consider translating estimates of relative risk into absolute risk for a meaningful time period |    |
| Other analyses           | 17  | Report other analyses done—eg analyses of subgroups and interactions, and sensitivity analyses                                                                                                                                                                                                                                                                                                                |    |
| <b>Discussion</b>        |     |                                                                                                                                                                                                                                                                                                                                                                                                               |    |
| Key results              | 18  | Summarise key results with reference to study objectives                                                                                                                                                                                                                                                                                                                                                      |    |
| <b>Limitations</b>       |     |                                                                                                                                                                                                                                                                                                                                                                                                               |    |
| Interpretation           | 20  | Give a cautious overall interpretation of results considering objectives, limitations, multiplicity of analyses, results from similar studies, and other relevant evidence                                                                                                                                                                                                                                    |    |
| Generalisability         | 21  | Discuss the generalisability (external validity) of the study results                                                                                                                                                                                                                                                                                                                                         |    |
| <b>Other information</b> |     |                                                                                                                                                                                                                                                                                                                                                                                                               |    |
| Funding                  | 22  | Give the source of funding and the role of the funders for the present study and, if applicable, for the original study on which the present article is based                                                                                                                                                                                                                                                 | 14 |

\*Give information separately for cases and controls in case-control studies and, if applicable, for exposed and unexposed groups in cohort and cross-sectional studies.

**Note:** An Explanation and Elaboration article discusses each checklist item and gives methodological background and published examples of transparent reporting. The STROBE checklist is best used in conjunction with this article (freely available on the Web sites of PLoS Medicine at <http://www.plosmedicine.org/>, Annals of Internal Medicine at <http://www.annals.org/>, and Epidemiology at <http://www.epidem.com/>). Information on the STROBE Initiative is available at [www.strobe-statement.org](http://www.strobe-statement.org).

# BMJ Open

## Comparing Four Service Delivery Models for Adolescent Girls and Young Women through the "Girl Power" study: Protocol for a Multisite Quasi-experimental Cohort Study

|                                 |                                                                                                                                                                                                                                                                                                                                                                                                                                                                                                                                                                                                                                                                                                                                                                                                                                                                                                                                                      |
|---------------------------------|------------------------------------------------------------------------------------------------------------------------------------------------------------------------------------------------------------------------------------------------------------------------------------------------------------------------------------------------------------------------------------------------------------------------------------------------------------------------------------------------------------------------------------------------------------------------------------------------------------------------------------------------------------------------------------------------------------------------------------------------------------------------------------------------------------------------------------------------------------------------------------------------------------------------------------------------------|
| Journal:                        | <i>BMJ Open</i>                                                                                                                                                                                                                                                                                                                                                                                                                                                                                                                                                                                                                                                                                                                                                                                                                                                                                                                                      |
| Manuscript ID                   | bmjopen-2017-018480.R2                                                                                                                                                                                                                                                                                                                                                                                                                                                                                                                                                                                                                                                                                                                                                                                                                                                                                                                               |
| Article Type:                   | Protocol                                                                                                                                                                                                                                                                                                                                                                                                                                                                                                                                                                                                                                                                                                                                                                                                                                                                                                                                             |
| Date Submitted by the Author:   | 06-Nov-2017                                                                                                                                                                                                                                                                                                                                                                                                                                                                                                                                                                                                                                                                                                                                                                                                                                                                                                                                          |
| Complete List of Authors:       | Rosenberg, Nora; University of North Carolina, Pettifor, Audrey; U of North Carolina, Epidemiology<br>Myers, Laura; Desmond Tutu HIV Foundation<br>Phanga, Twambilile; University of North Carolina Project<br>Marcus, Rebecca; Desmond Tutu HIV Foundation<br>Bhushan, Nivedita; University of North Carolina at Chapel Hill, Health Behavior<br>Madlingozi, Nomtha; Desmond Tutu HIV Foundation<br>Vansia, Dhrukika; University of North Carolina Project<br>Masters, Avril; Desmond Tutu HIV Foundation<br>Maseko, Bertha; University of North Carolina Project<br>Mtwisha, Lulu; Desmond Tutu HIV Foundation<br>Kachigamba, Annie; Lilongwe District Health Office<br>Tang, Jennifer; University of North Carolina at Chapel Hill; University of North Carolina Project<br>Hosseinipour, Mina C.; University of North Carolina; University of North Carolina Project<br>Bekker, Linda Gail; University of Cape Town; Desmond Tutu HIV Foundation |
| <b>Primary Subject Heading</b>: | Global health                                                                                                                                                                                                                                                                                                                                                                                                                                                                                                                                                                                                                                                                                                                                                                                                                                                                                                                                        |
| Secondary Subject Heading:      | HIV/AIDS, Health services research, Sexual health                                                                                                                                                                                                                                                                                                                                                                                                                                                                                                                                                                                                                                                                                                                                                                                                                                                                                                    |
| Keywords:                       | EPIDEMIOLOGY, International health services < HEALTH SERVICES ADMINISTRATION & MANAGEMENT, HIV & AIDS < INFECTIOUS DISEASES, Public health < INFECTIOUS DISEASES, Child protection < PAEDIATRICS                                                                                                                                                                                                                                                                                                                                                                                                                                                                                                                                                                                                                                                                                                                                                     |
|                                 |                                                                                                                                                                                                                                                                                                                                                                                                                                                                                                                                                                                                                                                                                                                                                                                                                                                                                                                                                      |

SCHOLARONE™  
Manuscripts

**Title Page:**

For submission to BMJ Open  
(Study Protocol submission)

**Title:**

Comparing Four Service Delivery Models for Adolescent Girls and Young Women  
through the “Girl Power” study: Protocol for a Multisite Quasi-experimental Cohort Study

**Short Title:**

The “Girl Power” protocol

**Authors:**

Nora E. Rosenberg,<sup>1,2</sup> Audrey E. Pettifor,<sup>2</sup> Laura Myers,<sup>3</sup> Twambilile Phanga,<sup>1</sup> Rebecca Marcus,<sup>3</sup> Nivedita  
Bhushan,<sup>1,2</sup> Nomtha Madlingozi,<sup>3</sup> Dhrutika Vansia,<sup>1</sup> Avril Masters<sup>3</sup>, Bertha Maseko,<sup>1,3</sup> Lulu Mtwisha,<sup>3</sup>  
Annie Kachigamba,<sup>4</sup> Jennifer Tang,<sup>1,2</sup> Mina Hosseinipour,<sup>1,2</sup> Linda-Gail Bekker<sup>3</sup>

**Affiliations:**

1. University of North Carolina Project, Lilongwe, Malawi
2. University of North Carolina, Chapel Hill, Chapel Hill, USA
3. Desmond Tutu HIV Foundation, Cape Town, South Africa
4. Lilongwe District Health Office, Lilongwe, Malawi

**Corresponding author:**

Nora E. Rosenberg, PhD  
University of North Carolina Project  
Tidziwe Centre, Private Bag A-104  
Lilongwe, Malawi  
+265 (0) 99 109 0676  
[Nora\\_Rosenberg@unc.edu](mailto:Nora_Rosenberg@unc.edu)

Abstract word count: 300

Word Count: 3055



## Abstract

**Introduction:** In sub-Saharan Africa, adolescent girls and young women (AGYW) face a range of sexual and reproductive health challenges. Clinical, behavioral, and structural interventions have each reduced these risks and improved health outcomes. However, combinations of these interventions have not been compared to each other or to no intervention at all. The “Girl Power” study is designed to systematically make these comparisons.

**Methods and Analysis:** Four comparable health facilities in Malawi and South Africa (N=8) were selected and assigned to one of the following models of care:

- 1) Standard of care: AGYW can receive family planning, HIV testing and counseling (HTC), and STI syndromic management in 3 separate locations with 3 separate queues with the general population. No youth-friendly spaces, clinic modifications or trainings are offered.
- 2) Youth-Friendly Health Services (YFHS): AGYW are meant to receive integrated family planning, HTC, and STI services in dedicated youth spaces with youth-friendly modifications and providers trained in YFHS.
- 3) YFHS + behavioral intervention (BI): In addition to YFHS, AGYW can attend twelve monthly theory-driven, facilitator-led, interactive sessions on health, finance, and relationships.
- 4) YFHS + BI + conditional cash transfer (CCT): In addition to YFHS and BI, AGYW receive up to twelve CCTs conditional on monthly BI session attendance.

At each clinic, 250 AGYW 15-24 years old (N=2000 total) will be consented, enrolled, and followed for one year. Each participant will complete a behavioral survey at enrollment, 6-months, and 12-months. All clinical, behavioral, and CCT services will be captured. Outcomes of interest include uptake of each package element and reduction in HIV risk behaviors. A qualitative sub-study will be conducted.

**Ethics/Dissemination:** This study has received ethical approval from the University of North Carolina, the University of Cape Town, and Malawi’s National Health Science Research Committee. Study plans, processes, and findings will be disseminated to stakeholders, in peer-reviewed journals, and at conferences.

### Strengths and Limitations of the this study

- Within each country, the selection of four comparable clinics and random assignment of each to one of the four models of service delivery is a key strength.
- The potential for differential recruitment, retention, and data ascertainment across sites are limitations.
- The study is not powered to detect differences in biologic outcomes, especially HIV incidence, a limitation.
- Implementing a similar set of models in two distinct sub-Saharan contexts enhances generalizability, a key strength.

## Introduction

In sub-Saharan Africa (SSA), adolescent girls and young women (AGYW) 15-24 years old are vulnerable to a wide range of sexual and reproductive health (SRH) challenges, including acquisition of HIV and sexually transmitted infections (STI), unintended and unwanted pregnancies, and intimate partner violence (IPV). These challenges have many common underlying health system, behavioral, and structural drivers that have not, to our knowledge, been addressed and assessed in combination—in a youth friendly service delivery environment, with behavioral interventions, and with socio-economic support.

AGYW in SSA typically experience a service delivery environment characterized by judgmental provider attitudes, a lack of privacy, inconvenient hours, and non-integrated services.<sup>1</sup> As a result, service utilization by AGYW for SRH remains low. Youth-friendly health services (YFHS) that include provider training, clinic modifications, and community-based demand creation are promising approaches for increasing uptake of such services.<sup>1-6</sup> Eight out of nine randomized or quasi-experimental studies in SSA assessing YFHS models with these components increased service uptake by AGYW.<sup>3</sup> However, to our knowledge, such a platform has never been tested in combination with behavioral and structural interventions.

Offering behavioral interventions (BIs) within a YFHS platform could further enhance service uptake and address other behavioral risks and psychosocial outcomes. The social context of intimate relationships in SSA is characterized by severe gender inequality. Gender norms favor male control over sexual intercourse, often leaving young women with less power in sexual decision-making.<sup>7-10</sup> Additionally, many young women have older male partners, frequently with a transactional dimension, who are more likely to be HIV-infected.<sup>11-15</sup> BIs based on the theory of gender and power,<sup>16,17</sup> and social cognitive theory<sup>18</sup> have been shown to address these power imbalances and reduce multiple partnerships, HSV-2 incidence, and IPV.<sup>19-21</sup> All of these evidence-based interventions address gender norms and involve participatory activities for groups of young women. Synthesizing the most effective elements of these “empowerment” interventions and offering them within a YFHS service delivery platform could

1  
2  
3 help reduce behavioral sources of risk, improve psychosocial outcomes, and generate demand for health  
4 services. Assessing evidence-based clinical and behavioral interventions is a critical next step.  
5  
6

7  
8 Cash transfers are also a promising tool for preventing HIV among AGYW.<sup>22-24</sup> In Malawi, when  
9 cash payments were given to girls and their guardians they were more likely to remain in school, less  
10 likely to report age-disparate relationships, and have lower HIV and HSV-2 prevalence.<sup>22</sup> In South Africa,  
11 adolescents living in homes receiving a national child grant reported half the incidence of transactional  
12 sex and much less age-disparate sex than those in homes not receiving it.<sup>23</sup> In a South African trial, cash  
13 transfers conditioned on schooling did not lead to lowered HIV incidence, but did lead to reductions in  
14 intimate partner violence and sexual risk.<sup>25</sup> However, to our knowledge, a cash transfer program has not  
15 been evaluated for AGYW in a clinical environment, nor has it been implemented in combination with a  
16 behavioral intervention. Understanding whether a cash transfer provides benefits in combination with a  
17 YFHS service delivery platform and empowerment-based BI is not known.  
18  
19  
20  
21  
22  
23  
24  
25  
26  
27  
28

29 It is becoming widely acknowledged that combination HIV prevention packages that include  
30 effective, acceptable, and scalable clinical, socio-behavioral and structural interventions may have the  
31 greatest impact.<sup>26-29</sup> However, it is not known how best to combine different intervention levels for  
32 maximal effectiveness for multiple outcomes. The Girl Power study is designed to compare three  
33 different combinations of evidence-based interventions to one another and to a standard of care and to  
34 assess their impact on a range of care-seeking and sexual risk behaviors in two sub-Saharan African  
35 countries.  
36  
37  
38  
39  
40  
41  
42  
43  
44  
45

## 46 **Methods and Analysis**

### 47 *Study Setting*

48  
49 The Girl Power study is an ongoing study (February 2016-November 2017) being conducted in  
50 Malawi and South Africa. These countries represent two prototypical, yet distinct sub-Saharan African  
51 contexts. In Malawi, based on nationally representative household data, first births often occur early, at a  
52 median age of 19 years, and within the context of marriage.<sup>30</sup> In South Africa, sexual activity tends to be  
53  
54  
55  
56  
57  
58  
59  
60

1  
2  
3 outside of the context of marriage, with a somewhat later age of first birth.<sup>31,32</sup> Malawi is characterized by  
4 extreme poverty with the majority of the population living on less than \$1 per day, whereas South Africa  
5 has extreme wealth disparities. In spite of these socio-economic differences, both countries have high  
6 HIV prevalence levels—6% of women 20-24 years old are HIV-infected in Malawi and 17% in South  
7 Africa, rates considerably higher than their male counterparts.<sup>30</sup> Sexual violence is also a serious problem  
8 in both countries, with high rates of non-consensual sex reported by young women.<sup>33-35</sup> Additionally, both  
9 have public sector health facilities with human resource shortages, stock-outs of pharmaceuticals and  
10 supplies, long queues, and providers who exhibit negative attitudes towards AGYW. It was within these  
11 contexts that the Girl Power study was conceptualized.

12  
13  
14  
15  
16  
17  
18  
19  
20  
21  
22  
23 Four comparable public sector health facilities were selected in each country. In Malawi, the four  
24 sites are public-sector health centers in Lilongwe. All sites are on a main road, have antenatal volumes  
25 >200 clients per month, and have antenatal HIV prevalence  $\geq 5\%$ . These sites have higher HIV prevalence  
26 than the surrounding rural areas where antenatal HIV prevalence is  $< 5\%$ . In South Africa, the four sites  
27 are in the Klipfontein and Mitchell's Plain areas in the Western Cape, which serve primarily black and  
28 coloured populations. These are high-density, low socioeconomic peri-urban townships comprised  
29 predominantly of informal dwellings. Antenatal prevalence in the Western Cape is 17%. In both  
30 countries, each clinic serves distinct communities. In South Africa, biometric identification is being used  
31 to ensure the same people do not enroll in more than one site. In Malawi, all sites are at least 7km apart.

32  
33  
34  
35  
36  
37  
38  
39  
40  
41  
42  
43 Prior to the study, all sites in both countries offered free HIV testing and counseling (HTC),  
44 contraception, and STI services in separate locations within each clinic with separate queues. Condoms  
45 were also available for free at all sites—in the pharmacy at the Malawian sites and throughout the clinic at  
46 the South African sites. At all sites in both countries AGYW could receive general health services with  
47 the general population. However, there were no distinct YFHS spaces, times, or providers, no behavioral  
48 interventions (BIs), and no opportunities for CCTs within the clinic.

### *Study Design and Interventions*

Girl Power is a quasi-experimental prospective cohort study comparing four different models of service delivery and their impacts on care-seeking and sexual risk behaviors among AGYW (Figure 1). The primary outcomes of interest are service uptake and behavioral risks. Participants enrolled at all sites will complete behavioral surveys at baseline, six, and twelve months and have their clinical data ascertained over a one-year period. In each country, each clinic was randomly assigned to one of the following models of care:

- Model 1: Standard of care (SOC): The SOC offers HTC, contraception, STI syndromic management and condoms to AGYW. However, health care providers have not been trained in YFHS and clinics have not made YFHS modifications, regarding hours, clinic navigation, integration, cost, or space.
- Model 2: YFHS: HTC, contraception, and STI services are offered by health providers who have been trained in YFHS. YFHS modifications have been made to the clinics, including clinic navigation (both countries), a youth-only space with integrated service provision (Malawi), and longer hours (Malawi).
- Model 3: YFHS + BI: In addition to the YFHS package, participants can attend twelve monthly facilitator-led, small-group interactive sessions. They are based on other evidence-based interventions from the region,<sup>17,19,21</sup> and are motivated by the theory of gender and power and Social Cognitive Theory. These sessions address sexual health topics (e.g. HIV, reproductive health), social issues (e.g. partner communication, peer pressure, and intimate partner violence), financial literacy (e.g. budgeting, saving, and investing), and general topics (e.g. self-esteem, goal-setting, and decision-making). Each session includes an activity to do at home after the session in order to encourage behavior change. Each country adapted curricula in a culturally-responsive manner; although sessions were not identical across countries, they explore similar themes. We expect sessions will be delivered to groups of 10-20 girls at once.

- 1  
2  
3  
4  
5  
6  
7  
8  
9  
10  
11  
12  
13
- Model 4: YFHS + BI + conditional cash transfer (CCT): In addition to the YFHS package and empowerment sessions, AGYW received a monthly CCT (approximately \$6) conditional on attending the monthly empowerment session. Each young woman could receive up to 12 CCTs (one per month). In Malawi, the CCT is being provided in physical cash and in South Africa the CCT is provided electronically.

14 Study and clinical personnel, training activities, and clinical modifications by country and model are  
15 described in greater detail in Table 1.  
16  
17  
18  
19

### 20 *Study Population*

21 At each of the eight sites, 250 AGYW will be recruited and followed for one year. Eligibility  
22 criteria include being female, 15-24 years old, residing in the clinic's catchment area, and willing to be  
23 enrolled for a one-year period. The intention is to recruit AGYW who are already sexually active or likely  
24 to become sexually active, although this is not a strict eligibility criterion. In total, 1000 AGYW will be  
25 enrolled in each country (N=2000 total).  
26  
27  
28  
29  
30  
31  
32

33 Recruitment will occur comparably at each site through a combination of community outreach  
34 activities, self-referral, and referral through invitations from other participants. Outreach workers will  
35 visit parts of the catchment area known to be high-risk. Through one-on-one conversations they will build  
36 rapport, assess sexual activity and past care-seeking behaviors, promote the services at their site, and  
37 invite them to participate. AGYW who enroll in the study will be provided with invitations to invite  
38 friends who they believe would also benefit.  
39  
40  
41  
42  
43  
44  
45

46 Follow-up phone and physical tracing will be conducted for girls who miss their six or twelve  
47 month visits. We will make comparable attempts to trace participants at all four clinics to avoid  
48 differential loss-to-follow-up and provide the same transport reimbursement for the three research visits  
49 across all four sites. These efforts are designed to minimize differential loss-to-follow-up.  
50  
51  
52  
53  
54  
55  
56  
57  
58  
59  
60

Table 1. Girl Power Personnel, Training and Clinical Modifications by Clinic and Country

|                                  | Malawi                                                                                                                                                |                                                                                                                                                                                                                                                                          |                                                                            |             | South Africa                                                                                                                                                                   |                                                                                      |                                                                     |             |
|----------------------------------|-------------------------------------------------------------------------------------------------------------------------------------------------------|--------------------------------------------------------------------------------------------------------------------------------------------------------------------------------------------------------------------------------------------------------------------------|----------------------------------------------------------------------------|-------------|--------------------------------------------------------------------------------------------------------------------------------------------------------------------------------|--------------------------------------------------------------------------------------|---------------------------------------------------------------------|-------------|
|                                  | Model 1                                                                                                                                               | Model 2                                                                                                                                                                                                                                                                  | Model 3                                                                    | Model 4     | Model 1                                                                                                                                                                        | Model 2                                                                              | Model 3                                                             | Model 4     |
| Clinical model                   | SOC                                                                                                                                                   | YFHS                                                                                                                                                                                                                                                                     | YFHS+BI                                                                    | YFHS+BI+CCT | SOC                                                                                                                                                                            | YFHS                                                                                 | YFHS+BI                                                             | YFHS+BI+CCT |
| <b>Personnel</b>                 |                                                                                                                                                       |                                                                                                                                                                                                                                                                          |                                                                            |             |                                                                                                                                                                                |                                                                                      |                                                                     |             |
| Research                         | <u>Research assistant:</u> Young (<29) female full-time staff responsible for all consenting, screening, enrolment, and behavioral surveys (1/clinic) |                                                                                                                                                                                                                                                                          |                                                                            |             | <u>Research assistant:</u> Female full-time staff responsible for all consenting, screening, enrolment, and behavioral surveys (1/clinic)                                      |                                                                                      |                                                                     |             |
| Outreach                         | <u>Peer outreach workers:</u> Young full-time lay staff responsible for recruitment and retention activities. (2/clinic)                              | <u>Peer outreach workers/navigators:</u> Young full-time lay staff responsible for recruitment and retention activities (outreach roles). They also welcome participants, assess their sexual and reproductive health needs, and help with clinic navigation. (2/clinic) |                                                                            |             | <u>Peer Outreach workers:</u> Temporary staff responsible for community outreach and recruitment at study initiation (2/clinic)                                                |                                                                                      |                                                                     |             |
| Navigation                       | -                                                                                                                                                     |                                                                                                                                                                                                                                                                          |                                                                            |             | <u>Peer navigator:</u> Full-time staff who welcome participants, discuss sexual and reproductive health needs, fetch patient files, and help with clinic navigation (1/clinic) |                                                                                      |                                                                     |             |
| Family planning and STI services | -                                                                                                                                                     | <u>Nurses:</u> 4-5 government nurses from these sites were assigned to rotate through a youth-focused Girl Power clinic.                                                                                                                                                 |                                                                            |             | -                                                                                                                                                                              | <u>Nurses:</u> 1-3 government nurses provide SRH services to Girl Power participants |                                                                     |             |
| HIV counseling and testing       |                                                                                                                                                       | <u>Counselor:</u> 1 young female HIV counselor was assigned to the Girl Power clinic.                                                                                                                                                                                    |                                                                            |             | <u>Counselor:</u> 1-3 government HTC counselors are available to attend to Girl Power participants                                                                             |                                                                                      |                                                                     |             |
| Workshop facilitation            | -                                                                                                                                                     | -                                                                                                                                                                                                                                                                        | <u>Facilitators:</u> Young females lead empowerment sessions (1/facility). |             | -                                                                                                                                                                              | -                                                                                    | <u>Facilitators:</u> Females lead empowerment sessions (1/facility) |             |
| <b>Training</b>                  |                                                                                                                                                       |                                                                                                                                                                                                                                                                          |                                                                            |             |                                                                                                                                                                                |                                                                                      |                                                                     |             |
| Protocol training                |                                                                                                                                                       | Study overview and design, clinical data collection, Good Clinical Practice (3 days) (all staff)                                                                                                                                                                         |                                                                            |             | Study overview and design, data collection, sexual and reproductive health refresher, values clarification (1-2 days)                                                          |                                                                                      |                                                                     |             |
| YFHS training                    |                                                                                                                                                       | Medical and psychosocial support for adolescents (2 day) (all staff)                                                                                                                                                                                                     |                                                                            |             | -                                                                                                                                                                              | Medical and psychosocial support for adolescents (1 day) (all staff)                 |                                                                     |             |
| Clinical training                |                                                                                                                                                       | Nurses trained on long-acting reversible contraception (5 days) and STI syndromic management (5 days)                                                                                                                                                                    |                                                                            |             | All nurses expected to be familiar with these provision of all contraceptive methods and STI syndromic management. Provided on-the-job training.                               |                                                                                      |                                                                     |             |
| <b>Clinical Modifications</b>    |                                                                                                                                                       |                                                                                                                                                                                                                                                                          |                                                                            |             |                                                                                                                                                                                |                                                                                      |                                                                     |             |
| Space                            | -                                                                                                                                                     | Dedicated space for AGYW service delivery in a separate area from general clinic to ensure privacy from adults                                                                                                                                                           |                                                                            |             | -                                                                                                                                                                              | Dedicated waiting and/or welcome area for AGYW                                       |                                                                     |             |
| Hours                            | Typically morning hours                                                                                                                               | AGYW can come in the morning or afternoon                                                                                                                                                                                                                                |                                                                            |             | AGYW can come in the morning or afternoon                                                                                                                                      |                                                                                      |                                                                     |             |
| Cost                             | STI medications require payment                                                                                                                       | All services are free                                                                                                                                                                                                                                                    |                                                                            |             | All services are free                                                                                                                                                          |                                                                                      |                                                                     |             |



### *Data Collection and Management*

The two primary sources of data collection are a detailed behavioral survey and clinical service records. The behavioral survey is administered at three time points—at study enrollment, month six, and month 12. The behavioral survey contains questions about demographics, socio-economic status, past and current care-seeking behaviors, sexual history, depression (10-item Center for Epidemiologic Studies of Depression scale), intimate partner violence (Modified Conflict Tactic Scale), alcohol consumption (NIAAA brief alcohol screening tool). The twelve-month assessment also includes assessments of the BI and the CCT. The behavioral survey will be self-administered in South Africa, except among illiterate participants; for these participants it will be interviewer-administered. In Malawi it will be interviewer-administered to all participants by young female research assistants. All surveys will be administered on encrypted password-protected Android tablets using Open Data Kit software and stored on secure servers.

In both countries, we will document delivery of HTC, family planning, and STI services. Due to the unique clinical contexts, data collection will occur differently in the two countries. In Malawi, a clinic card that contains all clinical information has been developed for the study and will be used by clinical staff at each patient encounter and housed at the clinic. In South Africa, clinical staff will record clinical activities in existing clinical records and study staff will transcribe this information onto a study-specific form. In both countries, these data will then be entered into tablets in ODK by trained research assistants. In all clinics, study staff will systematically examine clinical records to ensure consistent ascertainment.

In both countries, each participant will be identified through a unique identifier. In South Africa, participants' identities will be verified through biometric fingerprinting.

### *Study outcomes, analytic methods, and sample size*

The primary clinical outcomes are care-seeking behaviors using clinical data. Within each quarter, we will compare the proportion of participants who received HTC, male and/or female condoms, hormonal or long-acting contraception, and both condoms and another form of contraception. We will also explore the proportion of participants who receive STI services. For all of these services, we will

1  
2  
3 assess the proportion of participants who use each method ever, in each quarter, and in all quarters. These  
4  
5 data are available both through clinical abstraction, the primary measure of clinical effectiveness. Details  
6  
7 are reported in Table 2.  
8  
9

10 HIV risk behaviors collected on the behavioral survey are primary behavioral outcomes of  
11  
12 interest. Questions of particular interest are the proportion of AGYW who have multiple sexual partners,  
13  
14 have a considerably older male partner, and experience IPV. We will compare these indicators between  
15  
16 participants in each country in each model.  
17  
18

19 Table 2. Primary outcome measures

|                                         | Data source       | Time period                    | Numerator                                                                                                            | Denominator                                        |
|-----------------------------------------|-------------------|--------------------------------|----------------------------------------------------------------------------------------------------------------------|----------------------------------------------------|
| <b>Primary clinical outcomes</b>        |                   |                                |                                                                                                                      |                                                    |
| HIV testing uptake                      | Clinical record   | Quarter 1, 2, 3,4, ever, all   | Number with an HIV test recorded in each period                                                                      | Persons HIV-negative or HIV-unknown in that period |
| Condom uptake                           | Clinical record   | Quarter 1, 2, 3,4, ever, all   | Number who received condoms in each period                                                                           | Full cohort                                        |
| Contraceptive uptake                    | Clinical record   | Quarter 1, 2, 3,4, ever, all 4 | Number who received contraceptive pills or injections or received/continued long-acting contraception in each period | Full cohort                                        |
| Dual method uptake                      | Clinical record   | Quarter 1, 2, 3,4, ever, all   | Number with condom and contraceptive uptake in each period                                                           | Full cohort                                        |
| <b>Primary sexual behavior outcomes</b> |                   |                                |                                                                                                                      |                                                    |
| Age disparate sex                       | Behavioral survey | 12 months                      | Number reporting at least one current partner $\geq 10$ years older                                                  | Number who took 12 month behavioral survey         |
| Multiple partners in the last year      | Behavioral survey | 12 months                      | Number reporting $>1$ sexual partner in the last year                                                                | Number who took 12 month behavioral survey         |
| Physical IPV                            | Behavioral survey | 6 and 12 months                | Number reporting physical IPV in that period                                                                         | Number who took 6, 12 month behavioral surveys     |
| Sexual IPV                              | Behavioral survey | 6 and 12 months                | Number reporting physical IPV in that period                                                                         | Number who took 6, 12 month behavioral surveys     |
| Emotional IPV                           | Behavioral survey | 6 and 12 months                | Number reporting physical IPV in that period                                                                         | Number who took 6, 12 month behavioral surveys     |

20  
21  
22  
23  
24  
25  
26  
27  
28  
29  
30  
31  
32  
33  
34  
35  
36  
37 For all primary clinical outcomes, we will conduct an intention to treat analysis, analyzing each  
38  
39 participant in her assigned clinic and assessing whether she received services in that clinic. We will use  
40  
41 generalized estimating equations to account for correlated records between each participant at each time  
42  
43 point. A log or identity link, binomial distribution, and robust variance estimates will be used to estimate  
44  
45  
46  
47  
48  
49  
50  
51  
52  
53  
54  
55  
56  
57  
58  
59  
60

1  
2  
3 risk ratios and risk differences and ninety-five percent confidence intervals. We will compare absolute  
4  
5 differences at each time point, as well as changes over time.  
6

7  
8 In Stata 12.0, we conducted two-sample tests of proportions to determine how much statistical  
9  
10 power would be available to detect differences between any two arms at any time point within each  
11  
12 country. Using an alpha level of 0.05 and a sample size of 250 participants per model we have >80%  
13  
14 power to detect differences  $\geq 13\%$  between any two models at any time point.  
15  
16

### 17 18 *Qualitative Sub-study*

19  
20 A qualitative sub-study will be conducted to better understand participant experiences with each  
21  
22 service delivery model. Twelve to 15 in-depth interviews (IDIs) will be conducted at each site in each  
23  
24 country (N=96-120 IDIs total). IDIs will focus on individual experiences with SOC, YFHS, BI, and CCT.  
25  
26 At each clinic we will purposively select a mixture of good care-seekers, poor-care-seekers, and HIV-  
27  
28 infected young women. Focus group discussions (FGDs) (N=2-3/site) will address norms surrounding  
29  
30 these same topics and strategies for improving or enhancing these services. At each site, we will have at  
31  
32 least one FGD with adolescent girls 15-19 years old and one with young women 20-24 years old. IDIs  
33  
34 and FGDs will be conducted in Chichewa in Malawi and in isiXhosa or English in South Africa. All IDIs  
35  
36 and FGDs will be transcribed and translated into English. They will be coded and analyzed using a  
37  
38 thematic approach.  
39  
40  
41  
42  
43  
44

### 45 **Ethics and Dissemination**

46  
47 This study was approved by the University of North Carolina Institutional Review Board (IRBIS  
48  
49 15-2901) and two local regulatory bodies: the Malawi National Health Sciences Research Committee  
50  
51 (NHSRC) (15/7/1447) and the University of Cape Town Human Research Ethics Committee (815/2015).  
52  
53 In South Africa, all AGYW 15-24 years could decide whether to provide informed consent for  
54  
55 themselves; those 15-17 years could seek optional parental consent. We requested that minors 15-17 years  
56  
57 be able to consent for themselves because they are able to receive all of these clinical services without  
58  
59  
60

1  
2  
3 parental consent. In a study designed to reduce barriers to care-seeking, obtaining parental consent could  
4 pose an undue barrier; the ethics committee agreed. In Malawi, AGYW 18-24 years will provide  
5 informed consent for themselves. AGYW 15-17 years will provide assent and have a parent, guardian, or  
6 authorized representative provide informed consent. We requested that minors be able to consent as  
7 adults, but this provision was denied. At each site, a community club of individuals  $\geq 18$  years who could  
8 serve as authorized representatives will be established, a suggestion made by the NHSRC.  
9

10  
11  
12  
13  
14  
15  
16  
17  
18  
19  
20  
21  
22  
23  
24  
25  
26  
27  
28  
29  
30  
31  
32  
33  
34  
35  
36  
37  
38  
39  
40  
41  
42  
43  
44  
45  
46  
47  
48  
49  
50  
51  
52  
53  
54  
55  
56  
57  
58  
59  
60

Dissemination activities will occur at all stages of the study: prior to implementation, at intermediate points during implementation, and at study culmination. Prior to study implementation, meetings were held with key local stakeholders, such as local health leadership (e.g. district, province, or city managers), clinical supervisors, and clinical staff. These meetings were designed to seek permission for study implementation, orient these stakeholders to study goals, and work together on implementation questions. Sensitization activities were also conducted with key community stakeholders, such as local chiefs and religious leaders, school headmasters, and library managers. These sensitizations were designed to inform key local leaders about the study, elicit buy-in and support, and facilitate recruitment. During study implementation, these same stakeholders will be engaged to report on study progress and discuss challenges. At the end of the study, results will be disseminated so that stakeholders and participants are aware of the study's primary findings. Additionally, in both countries, we have oriented policy-makers and implementing partners to study goals and progress. Results will be disseminated in peer-reviewed journals and at national and international meetings and conferences. Dissemination of final results is expected in 2018.

## Discussion

Our findings will need to be interpreted in light of potential biases. First, each model may preferentially recruit persons who are interested in the services at that clinic. For example, the absence of services in model 1 may lead to recruitment of persons who do not need any services and the presence of a cash transfer in model 4 may lead to recruitment of persons in need of cash. We will explore whether baseline behavioral and socio-economic characteristics differ by model, and if so conduct adjusted

1  
2  
3 analyses as needed. Second, it is possible that retention will be differential across arms. Different  
4 retention is precisely what we are trying to measure in clinical outcomes, but is problematic with respect  
5 to behavioral survey outcomes. To mitigate this risk, identical research incentives will be offered in all  
6 models at the three behavioral survey visits. We will explore the magnitude and nature of loss by clinic  
7 and use multiple imputation techniques and sensitivity analyses to address the loss that does occur.  
8

9  
10 Differential ascertainment of clinical outcomes is a third potential source of bias: clinical staff trained in  
11 models 2, 3, and 4 may capture services more consistently than staff in clinic 1: apparent differences in  
12 service uptake could in fact be differences in data capture. Observing whether clinical records are  
13 consistent with self-report will allow us to explore this potential bias. Finally, enrollment in more than  
14 one model is possible in the Malawi sites, which do not have biometric identification. If such  
15 contamination were to occur at a large scale, behavioral survey results would be biased towards the null, as  
16 response options from the same participant at multiple clinics would be similar. In spite of these potential  
17 limitations, we believe Girl Power makes an important and unique contribution.  
18  
19  
20  
21  
22  
23  
24  
25  
26  
27  
28  
29  
30

### 31 **Conclusion**

32  
33 Implementing combination interventions for HIV prevention among AGYW in SSA has become  
34 a major focus of governments and donors over the last several years. In most cases however, programs  
35 have not been rigorously evaluated for impact. Girl Power is expected to address this important gap in  
36 understanding and provide greater insights into how to support vulnerable AGYW related to SRH and  
37 HIV in SSA.  
38  
39  
40  
41  
42  
43  
44  
45  
46

### 47 **Author Contributions**

48  
49 NER, AEP, LGB, RM, JT, MH, AK, and LM1 designed the study. TP, NM, NB, DV, AM, BM, and LM2  
50 were responsible for study coordination and data acquisition. All authors either wrote or made substantial  
51 edits to the draft, approved the final version and take responsibility for the work.  
52  
53  
54  
55  
56  
57  
58  
59  
60

**Funding Statement**

The Girl Power study is funded by Evidence for HIV Prevention in Southern Africa (EHPSA), a DFID program managed by Mott MacDonald. N.E.R. is supported by the National Institutes of Health (R00 MH104154).

**Competing Interests Statement**

We have no competing interests to declare.

For peer review only

## References

1. Napierala Mavedzenge SM, Doyle AM, Ross DA. HIV prevention in young people in sub-Saharan Africa: a systematic review. *The Journal of adolescent health : official publication of the Society for Adolescent Medicine*. Dec 2011;49(6):568-586.
2. Mavedzenge SN, Luecke E, Ross DA. Effective approaches for programming to reduce adolescent vulnerability to HIV infection, HIV risk, and HIV-related morbidity and mortality: a systematic review of systematic reviews. *Journal of acquired immune deficiency syndromes*. Jul 1 2014;66 Suppl 2:S154-169.
3. Denno DM, Hoopes AJ, Chandra-Mouli V. Effective strategies to provide adolescent sexual and reproductive health services and to increase demand and community support. *The Journal of adolescent health : official publication of the Society for Adolescent Medicine*. Jan 2015;56(1 Suppl):S22-41.
4. Chandra-Mouli V, McCarraher DR, Phillips SJ, Williamson NE, Hainsworth G. Contraception for adolescents in low and middle income countries: needs, barriers, and access. *Reproductive health*. 2014;11(1):1.
5. Mbonye AK. Disease and health seeking patterns among adolescents in Uganda. *International journal of adolescent medicine and health*. Apr-Jun 2003;15(2):105-112.
6. Ross DA, Chagalucha J, Obasi AI, et al. Biological and behavioural impact of an adolescent sexual health intervention in Tanzania: a community-randomized trial. *Aids*. Sep 12 2007;21(14):1943-1955.
7. MacPhail C, Campbell C. 'I think condoms are good but, aai, I hate those things': condom use among adolescents and young people in a Southern African township. *Social Science & Medicine*. 2001;52:1613-1627.
8. Harrison A, Xaba N, Kunene P. Understanding safe sex: gender narratives of HIV and pregnancy prevention by rural South African school going youth. *Reproductive health matters*. 2001;9(17):63-71.

- 1  
2  
3 9. Pettifor A, Macphail C, Anderson AD, Maman S. 'If I buy the Kellogg's then he should [buy] the  
4  
5 milk': young women's perspectives on relationship dynamics, gender power and HIV risk in  
6  
7 Johannesburg, South Africa. *Cult Health Sex*. 2012;14(5):477-490.  
8
- 9  
10 10. Jaspan HB, Flisher AJ, Myer L, et al. Sexual health, HIV risk, and retention in an adolescent  
11  
12 HIV-prevention trial preparatory cohort. *The Journal of adolescent health : official publication of*  
13  
14 *the Society for Adolescent Medicine*. Jul 2011;49(1):42-46.  
15
- 16 11. Dunkle KL, Jewkes RK, Brown HC, Gray GE, McIntyre JA, Harlow SD. Gender-based  
17  
18 violence, relationship power, and risk of HIV infection in women attending antenatal clinics in  
19  
20 South Africa. *Lancet*. May 1 2004;363(9419):1415-1421.  
21
- 22 12. Pettifor A, Measham D, Rees H, Padian N. Sexual power and HIV risk, South Africa. *Emerging*  
23  
24 *infectious diseases*. 2004;10(11):1996-2004.  
25
- 26 13. Gilbert L, Raj A, Hien D, Stockman J, Terlikbayeva A, Wyatt G. Targeting the SAVA (Substance  
27  
28 Abuse, Violence, and AIDS) Syndemic Among Women and Girls: A Global Review of  
29  
30 Epidemiology and Integrated Interventions. *Journal of acquired immune deficiency syndromes*.  
31  
32 Jun 1 2015;69 Suppl 2:S118-127.  
33
- 34 14. Wamoyi J, Stobeanau K, Bobrova N, Abramsky T, Watts C. Transactional sex and risk for HIV  
35  
36 infection in sub-Saharan Africa: a systematic review and meta-analysis. *Journal of the*  
37  
38 *International AIDS Society*. 2016;19(1):20992.  
39
- 40 15. Dunkle KL, Jewkes RK, Brown HC, Gray GE, McIntyre JA, Harlow SD. Transactional sex  
41  
42 among women in Soweto, South Africa: prevalence, risk factors and association with HIV  
43  
44 infection. *Social science & medicine*. Oct 2004;59(8):1581-1592.  
45  
46
- 47 16. Wingood GM, Scd, DiClemente RJ. Application of the theory of gender and power to examine  
48  
49 HIV-related exposures, risk factors, and effective interventions for women. *Health education &*  
50  
51 *behavior : the official publication of the Society for Public Health Education*. Oct  
52  
53 2000;27(5):539-565.  
54  
55  
56  
57  
58  
59  
60



- 1  
2  
3  
4  
5  
6  
7  
8  
9  
10  
11  
12  
13  
14  
15  
16  
17  
18  
19  
20  
21  
22  
23  
24  
25  
26  
27  
28  
29  
30  
31  
32  
33  
34  
35  
36  
37  
38  
39  
40  
41  
42  
43  
44  
45  
46  
47  
48  
49  
50  
51  
52  
53  
54  
55  
56  
57  
58  
59  
60
17. Wingood GM, Reddy P, Lang DL, et al. Efficacy of SISTA South Africa on sexual behavior and relationship control among isiXhosa women in South Africa: results of a randomized-controlled trial. *Journal of acquired immune deficiency syndromes*. Jun 1 2013;63 Suppl 1:S59-65.
  18. Bandura A. Social cognitive theory: an agentic perspective. *Annual review of psychology*. 2001;52:1-26.
  19. Jewkes R, Nduna M, Levin J, et al. Impact of stepping stones on incidence of HIV and HSV-2 and sexual behaviour in rural South Africa: cluster randomised controlled trial. *Bmj*. 2008;337:a506.
  20. Jewkes RK, Dunkle K, Nduna M, Shai N. Intimate partner violence, relationship power inequity, and incidence of HIV infection in young women in South Africa: a cohort study. *Lancet*. Jul 3 2010;376(9734):41-48.
  21. Abramsky T, Devries K, Kiss L, et al. A community mobilisation intervention to prevent violence against women and reduce HIV/AIDS risk in Kampala, Uganda (the SASA! Study): study protocol for a cluster randomised controlled trial. *Trials*. 2012;13:96.
  22. Baird SJ, Garfein RS, McIntosh CT, Ozler B. Effect of a cash transfer programme for schooling on prevalence of HIV and herpes simplex type 2 in Malawi: a cluster randomised trial. *Lancet*. Apr 7 2012;379(9823):1320-1329.
  23. Cluver L, Orkin M, Boyes M, Sherr L. The child support grant and adolescent risk of HIV infection in South Africa--authors' reply. *The Lancet. Global health*. Apr 2014;2(4):e200.
  24. Pettifor A, MacPhail C, Nguyen N, Rosenberg M. Can money prevent the spread of HIV? A review of cash payments for HIV prevention. *AIDS and behavior*. Oct 2012;16(7):1729-1738.
  25. Pettifor A, MacPhail C, Hughes JP, et al. The effect of a conditional cash transfer on HIV incidence in young women in rural South Africa (HPTN 068): a phase 3, randomised controlled trial. *The Lancet. Global health*. Dec 2016;4(12):e978-e988.

- 1  
2  
3 26. Cluver LD, Orkin FM, Boyes ME, Sherr L. Cash plus care: social protection cumulatively  
4 mitigates HIV-risk behaviour among adolescents in South Africa. *Aids*. Jul 2014;28 Suppl  
5 3:S389-397.  
6  
7  
8  
9  
10 27. Vermund SH, Hayes RJ. Combination prevention: new hope for stopping the epidemic. *Current*  
11 *HIV/AIDS reports*. Jun 2013;10(2):169-186.  
12  
13  
14 28. Cluver LD, Orkin FM, Yakubovich AR, Sherr L. Combination Social Protection for Reducing  
15 HIV-Risk Behavior Among Adolescents in South Africa. *Journal of acquired immune deficiency*  
16 *syndromes*. May 1 2016;72(1):96-104.  
17  
18  
19  
20 29. Merson M, Padian N, Coates TJ, et al. Combination HIV prevention. *Lancet*. Nov 22  
21 2008;372(9652):1805-1806.  
22  
23  
24 30. National\_Statistics\_Office\_Malawi, ICF. *Malawi Demographic and Health Survey 2015-2016*.  
25 Zomba, Malawi and Rockville, Maryland, USA2017.  
26  
27  
28  
29 31. MacPhail C, Pettifor AE, Pascoe S, Rees HV. Contraception use and pregnancy among 15-24  
30 year old South African women: a nationally representative cross-sectional survey. *BMC medicine*.  
31 2007;5:31.  
32  
33  
34  
35 32. Statistics South Africa. *Census 2011: Fertility in South Africa*. Pretoria, South Africa 2015.  
36  
37  
38 33. Dunkle KL, Jewkes HC, Brown, et al. Prevalence and patterns of gender-based violence and  
39 revictimization among women attending antenatal clinics in Soweto, South Africa. *American*  
40 *Journal of Epidemiology*. 2004;160:230-239.  
41  
42  
43  
44 34. Jewkes R, Sikweyiya Y, Morrell R, et al. *Understanding men's health and use of violence:*  
45 *interface of rape and HIV in South Africa*. Medical Research Council, Pretoria, South Africa, 2009.  
46  
47  
48 35. *Violence against children and young women in Malawi: Findings from a national survey, 2013*.  
49 UNICEF, 2014.  
50  
51  
52  
53  
54  
55  
56  
57  
58  
59  
60

1  
2  
3 Figure 1 Legend: Figure 1 depicts the study design.  
4  
5  
6  
7  
8  
9  
10  
11  
12  
13  
14  
15  
16  
17  
18  
19  
20  
21  
22  
23  
24  
25  
26  
27  
28  
29  
30  
31  
32  
33  
34  
35  
36  
37  
38  
39  
40  
41  
42  
43  
44  
45  
46  
47  
48  
49  
50  
51  
52  
53  
54  
55  
56  
57  
58  
59  
60

For peer review only

1  
2  
3  
4  
5  
6  
7  
8  
9  
10  
11  
12  
13  
14  
15  
16  
17  
18  
19  
20  
21  
22  
23  
24  
25  
26  
27  
28  
29  
30  
31  
32  
33  
34  
35  
36  
37  
38  
39  
40  
41  
42  
43  
44  
45  
46  
47  
48  
49  
50  
51  
52  
53  
54  
55  
56  
57  
58  
59  
60

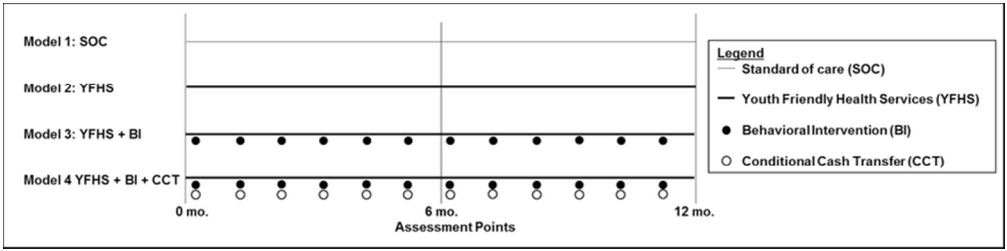

Figure 1 depicts the study design.

73x18mm (300 x 300 DPI)

peer review only

STROBE 2007 (v4) Statement—Checklist of items that should be included in reports of *cohort studies*

| Section/Topic                | Item # | Recommendation                                                                                                                                                                       | Reported on page # |
|------------------------------|--------|--------------------------------------------------------------------------------------------------------------------------------------------------------------------------------------|--------------------|
| Title and abstract           | 1      | (a) Indicate the study's design with a commonly used term in the title or the abstract                                                                                               | 1,2                |
|                              |        | (b) Provide in the abstract an informative and balanced summary of what was done and what was found                                                                                  | 2                  |
| <b>Introduction</b>          |        |                                                                                                                                                                                      |                    |
| Background/rationale         | 2      | Explain the scientific background and rationale for the investigation being reported                                                                                                 | 4-5                |
| Objectives                   | 3      | State specific objectives, including any pre-specified hypotheses                                                                                                                    | 5                  |
| <b>Methods</b>               |        |                                                                                                                                                                                      |                    |
| Study design                 | 4      | Present key elements of study design early in the paper                                                                                                                              | 6-8                |
| Setting                      | 5      | Describe the setting, locations, and relevant dates, including periods of recruitment, exposure, follow-up, and data collection                                                      | 5-6                |
| Participants                 | 6      | (a) Give the eligibility criteria, and the sources and methods of selection of participants. Describe methods of follow-up                                                           | 10                 |
|                              |        | (b) For matched studies, give matching criteria and number of exposed and unexposed                                                                                                  | NA                 |
| Variables                    | 7      | Clearly define all outcomes, exposures, predictors, potential confounders, and effect modifiers. Give diagnostic criteria, if applicable                                             | 10-12              |
| Data sources/<br>measurement | 8*     | For each variable of interest, give sources of data and details of methods of assessment (measurement). Describe comparability of assessment methods if there is more than one group | 10-12              |
| Bias                         | 9      | Describe any efforts to address potential sources of bias                                                                                                                            | 12                 |
| Study size                   | 10     | Explain how the study size was arrived at                                                                                                                                            | 12                 |
| Quantitative variables       | 11     | Explain how quantitative variables were handled in the analyses. If applicable, describe which groupings were chosen and why                                                         | 11                 |
| Statistical methods          | 12     | (a) Describe all statistical methods, including those used to control for confounding                                                                                                | 11                 |
|                              |        | (b) Describe any methods used to examine subgroups and interactions                                                                                                                  | NA                 |
|                              |        | (c) Explain how missing data were addressed                                                                                                                                          | NA                 |
|                              |        | (d) If applicable, explain how loss to follow-up was addressed                                                                                                                       | NA                 |
|                              |        | (e) Describe any sensitivity analyses                                                                                                                                                | NA                 |
| <b>Results</b>               |        |                                                                                                                                                                                      |                    |

|                          |     |                                                                                                                                                                                                                                                                                                                                                                                                               |    |    |
|--------------------------|-----|---------------------------------------------------------------------------------------------------------------------------------------------------------------------------------------------------------------------------------------------------------------------------------------------------------------------------------------------------------------------------------------------------------------|----|----|
| Participants             | 13* | (a) Report numbers of individuals at each stage of study—eg numbers potentially eligible, examined for eligibility, confirmed eligible, included in the study, completing follow-up, and analysed<br>(b) Give reasons for non-participation at each stage<br>(c) Consider use of a flow diagram                                                                                                               | NA |    |
| Descriptive data         | 14* | (a) Give characteristics of study participants (eg demographic, clinical, social) and information on exposures and potential confounders<br>(b) Indicate number of participants with missing data for each variable of interest<br>(c) Summarise follow-up time (eg, average and total amount)                                                                                                                |    |    |
| Outcome data             | 15* | Report numbers of outcome events or summary measures over time                                                                                                                                                                                                                                                                                                                                                |    |    |
| Main results             | 16  | (a) Give unadjusted estimates and, if applicable, confounder-adjusted estimates and their precision (eg, 95% confidence interval). Make clear which confounders were adjusted for and why they were included<br>(b) Report category boundaries when continuous variables were categorized<br>(c) If relevant, consider translating estimates of relative risk into absolute risk for a meaningful time period |    |    |
| Other analyses           | 17  | Report other analyses done—eg analyses of subgroups and interactions, and sensitivity analyses                                                                                                                                                                                                                                                                                                                |    |    |
| <b>Discussion</b>        |     |                                                                                                                                                                                                                                                                                                                                                                                                               |    |    |
| Key results              | 18  | Summarise key results with reference to study objectives                                                                                                                                                                                                                                                                                                                                                      |    | NA |
| <b>Limitations</b>       |     |                                                                                                                                                                                                                                                                                                                                                                                                               |    |    |
| Interpretation           | 20  | Give a cautious overall interpretation of results considering objectives, limitations, multiplicity of analyses, results from similar studies, and other relevant evidence                                                                                                                                                                                                                                    |    |    |
| Generalisability         | 21  | Discuss the generalisability (external validity) of the study results                                                                                                                                                                                                                                                                                                                                         |    |    |
| <b>Other information</b> |     |                                                                                                                                                                                                                                                                                                                                                                                                               |    |    |
| Funding                  | 22  | Give the source of funding and the role of the funders for the present study and, if applicable, for the original study on which the present article is based                                                                                                                                                                                                                                                 | 14 |    |

\*Give information separately for cases and controls in case-control studies and, if applicable, for exposed and unexposed groups in cohort and cross-sectional studies.

**Note:** An Explanation and Elaboration article discusses each checklist item and gives methodological background and published examples of transparent reporting. The STROBE checklist is best used in conjunction with this article (freely available on the Web sites of PLoS Medicine at <http://www.plosmedicine.org/>, Annals of Internal Medicine at <http://www.annals.org/>, and Epidemiology at <http://www.epidem.com/>). Information on the STROBE Initiative is available at [www.strobe-statement.org](http://www.strobe-statement.org).
